# Supplementary material for: Identification of early ammonium nitrate-responsive genes in rice roots
Source: PubMed Central journal article supplement (PMC5715151; doi:10.1038/s41598-017-17173-9), 2017-12-04
Supplement: 41598_2017_17173_MOESM1_ESM.pdf [file 41598_2017_17173_MOESM1_ESM.pdf]

## Identification of early ammonium nitrate-responsive genes in rice roots

Hsiu-Chun Yang<sup>†</sup>, Chia-Cheng Kan<sup>†</sup>, Tze-Huan Hung<sup>†</sup>, Ping-Han Hsieh<sup>†</sup>, Shi-Yun Wang, Wei-Yu Hsieh and Ming-Hsiun Hsieh\*

### Supplementary Information

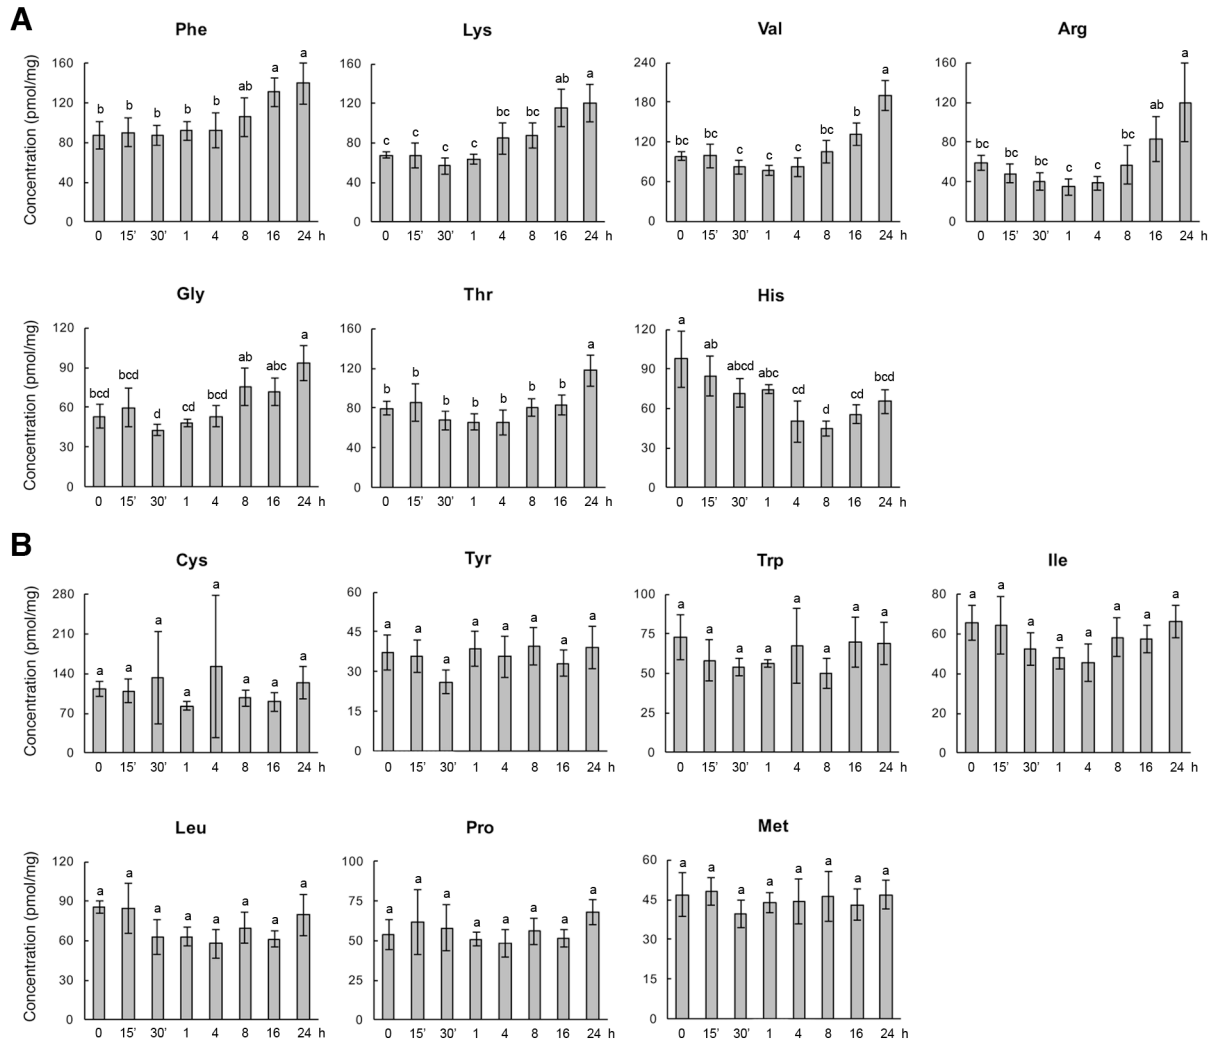

**Fig. S1** Amino acid contents in the rice roots during time course of ammonium nitrate treatment. **(A)** Contents of phenylalanine, lysine, valine, arginine, glycine, and threonine increased slightly in the roots of 17-day-old nitrogen-starved rice seedlings after 8–24 h of 1.43 mM ammonium nitrate treatment. The contents of histidine decreased slightly after 4–24 h of ammonium nitrate treatment. **(B)** Feeding of ammonium nitrate did not affect the contents of cysteine, tyrosine, tryptophan, isoleucine, leucine, proline and methionine in rice roots. Data are means  $\pm$  SD ( $n = 4$ ). Different letters indicate significant differences between treatments, tested by one-way ANOVA followed by Tukey's test ( $P < 0.05$ ).

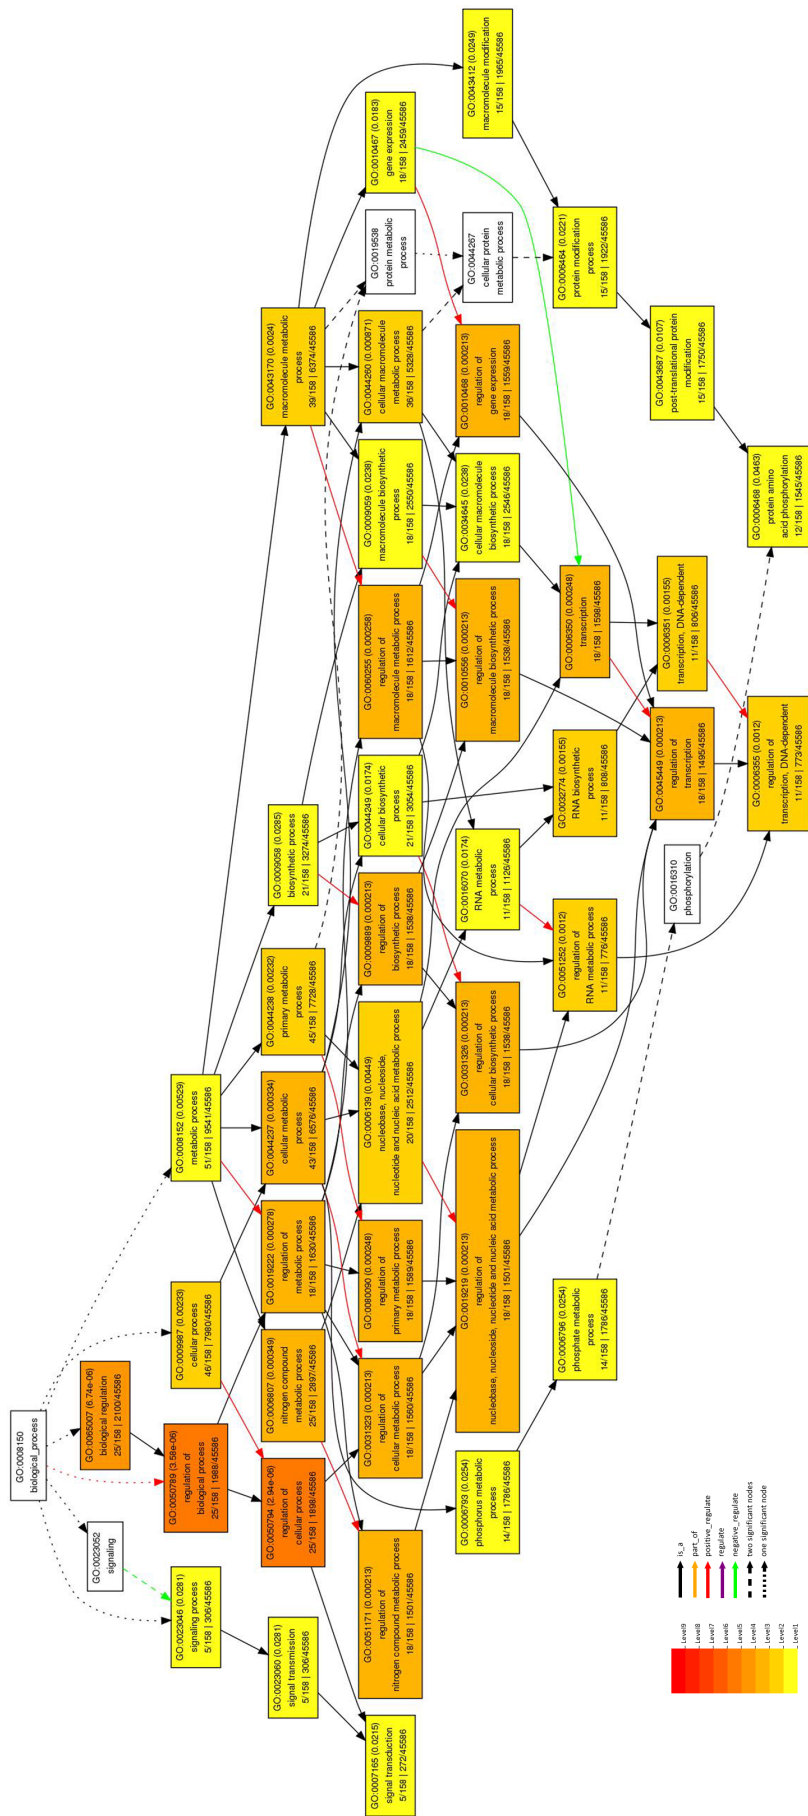

**Fig. S2** Gene ontology enrichment analysis of genes up-regulated by ammonium nitrate. The differentially expressed genes were analyzed by singular enrichment analysis using AgriGO. Significantly enriched GO categories in biological function are shown in yellow, orange and red (false discovery rate, FDR < 0.05).

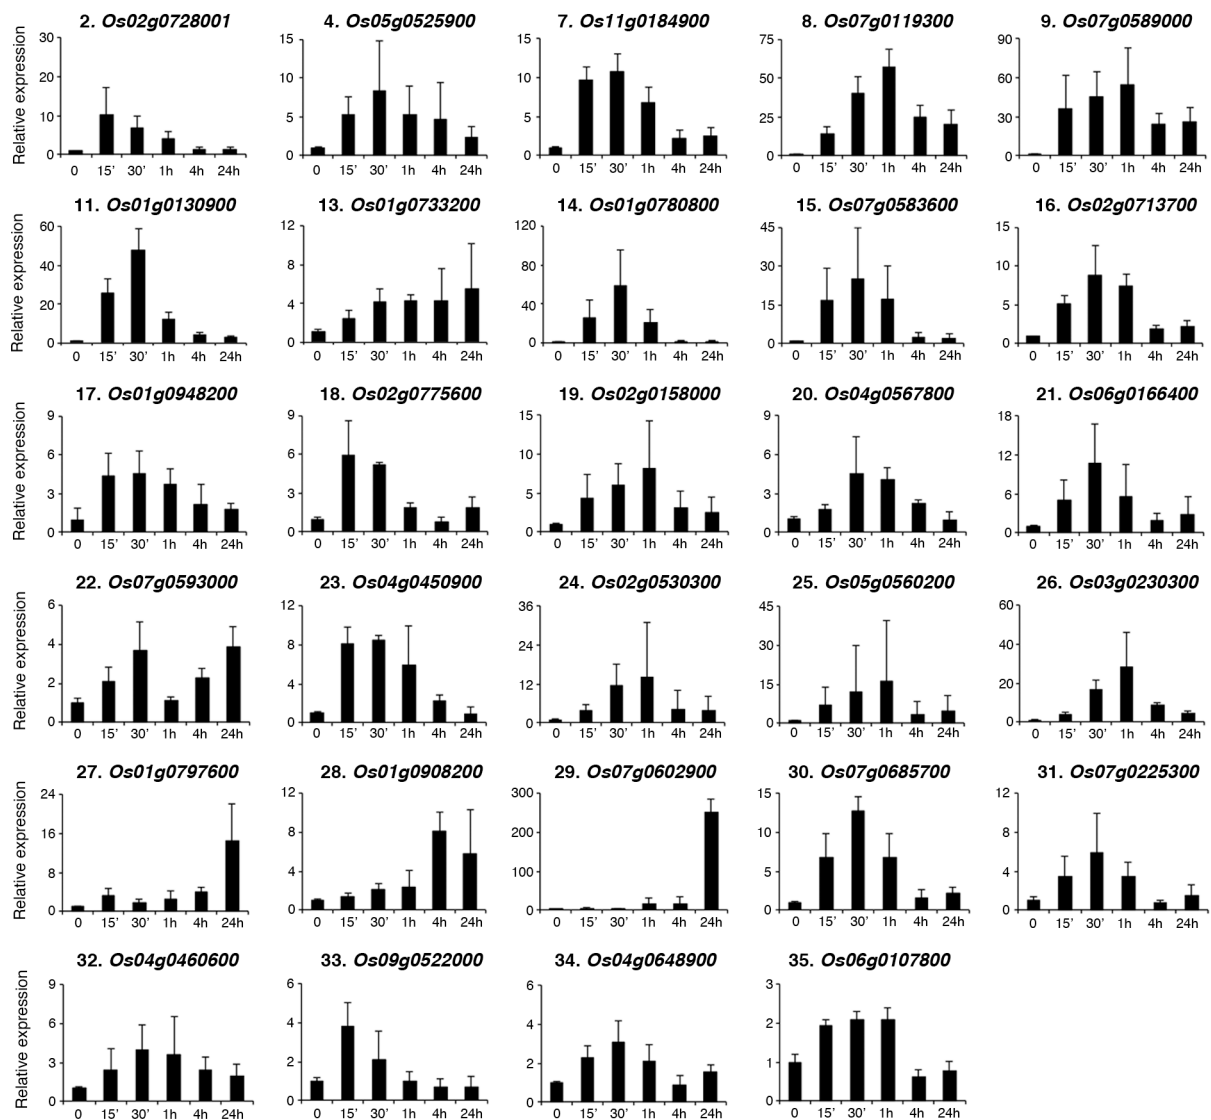

**Fig. S3** Quantitative RT-PCR analysis of genes encoding putative transcription factors/nuclear proteins that are rapidly induced by ammonium nitrate identified in this study. Total RNA extracted from roots of 17-day-old rice seedlings treated with ammonium nitrate for 0–24 h was used for qRT-PCR analysis. Relative expression indicates the fold-change of each gene as compared to that of control. The number of each gene corresponds to the number in Table 2. Results are shown as means  $\pm$  SD from three biological repeats.

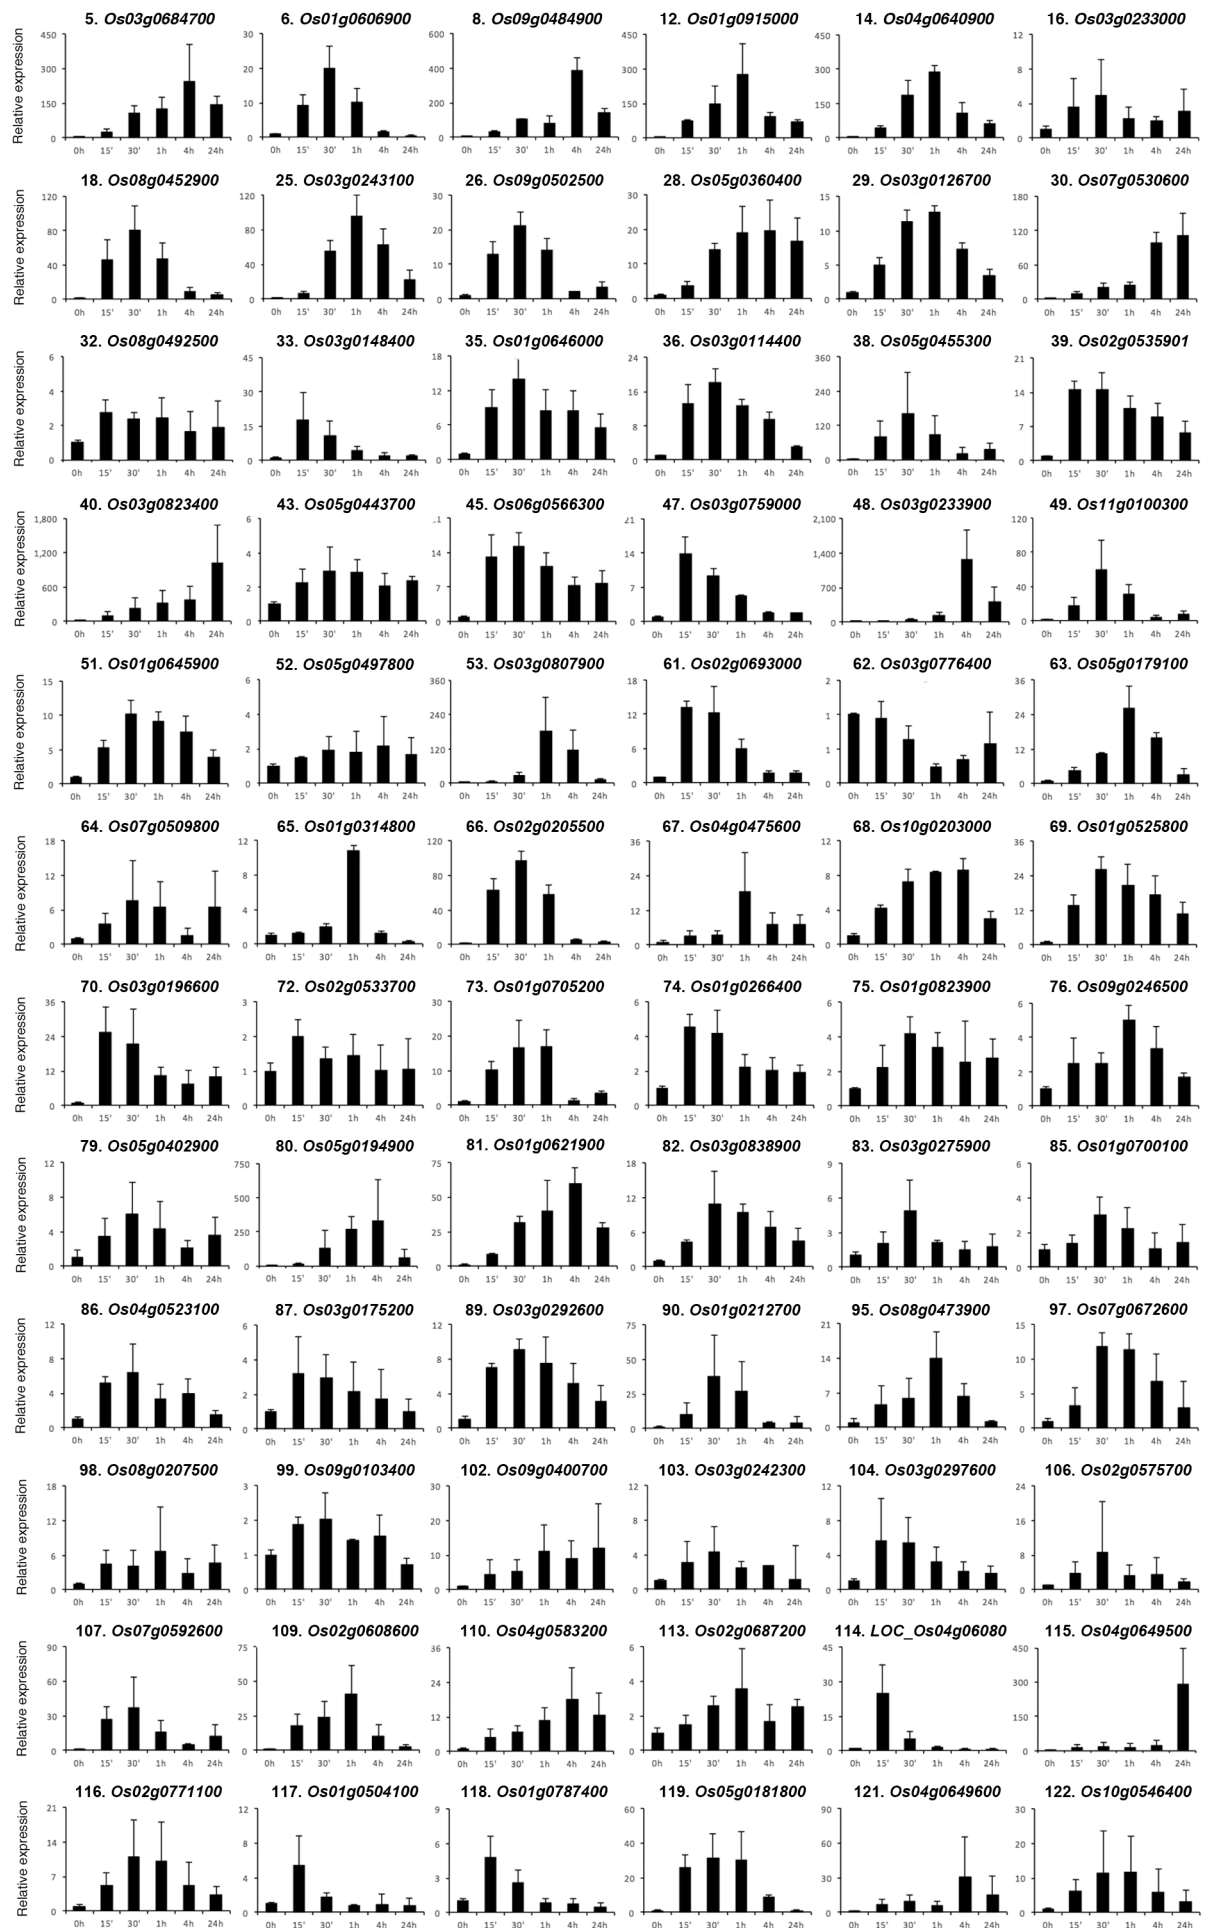

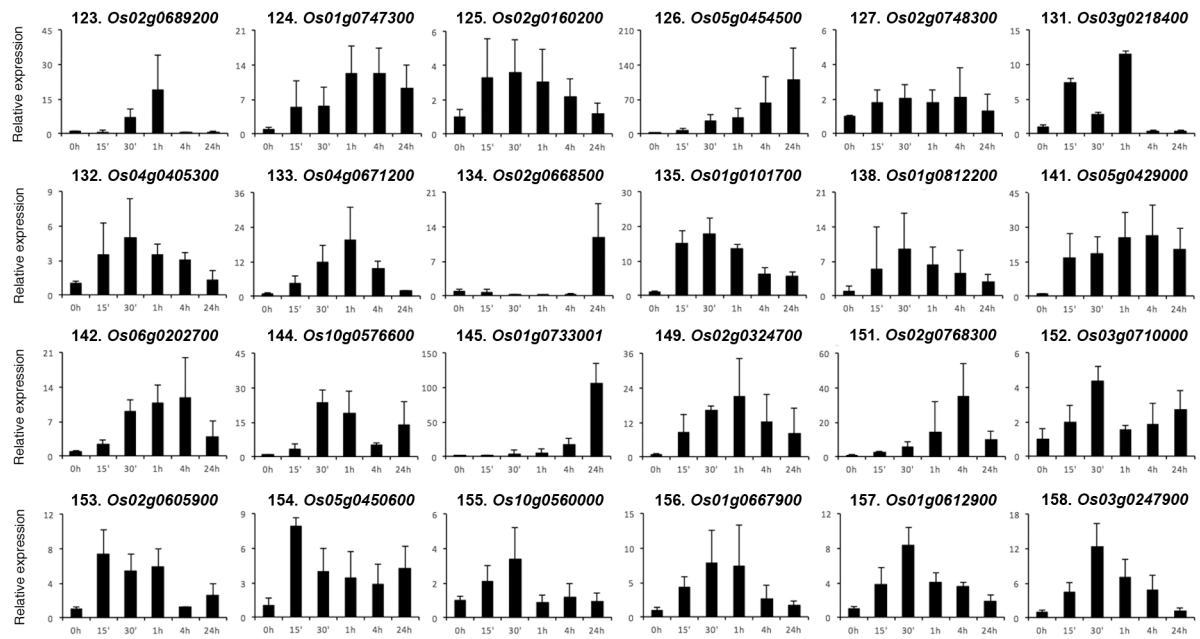

**Fig. S4** Quantitative RT-PCR analysis of early ammonium nitrate-responsive genes identified in this study. Total RNA extracted from roots of 17-day-old rice seedlings treated with 1.43 mM ammonium nitrate for 0–24 h was used for qRT-PCR analysis. Relative expression indicates the fold-change of each gene as compared to that of control. The number of each gene corresponds to the number in Table S1. Results are shown as means  $\pm$  SD from three biological repeats.

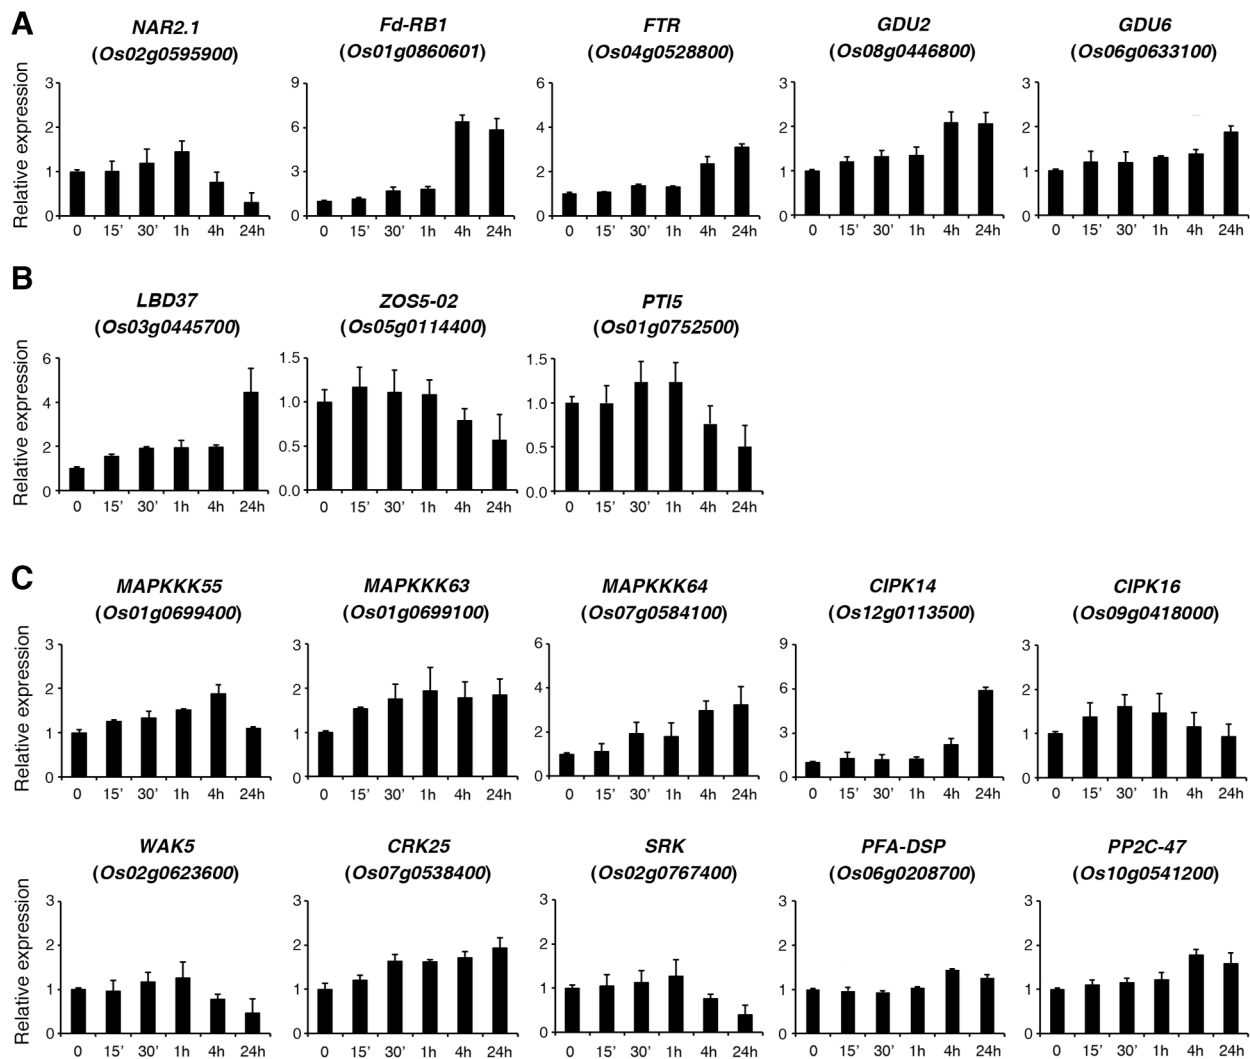

**Fig. S5** Quantitative RT-PCR analysis of early ammonium nitrate-responsive genes in rice shoots. Total RNA extracted from shoots of 17-day-old rice seedlings treated with 1.43 mM ammonium nitrate for 0–24 h was used for qRT-PCR analysis. Relative expression indicates the fold-change of each gene as compared to that of control. Two reference genes, *UBC3* (*Os02g0634800*) and *UBQ10* (*Os02g0161900*), were used to normalize the expression data. Results are shown as means  $\pm$  SD from three biological repeats.

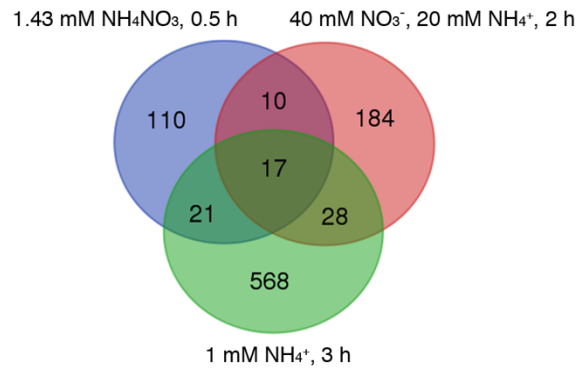

**Fig. S6** Venn diagram of genes commonly induced by ammonium and ammonium nitrate. The numbers are up-regulated genes in rice roots identified by Chandran *et al.*<sup>25</sup>, Obertello *et al.*<sup>40</sup>, and this study. Obertello *et al.*<sup>40</sup> treated rice seedlings with 40 mM nitrate and 20 mM ammonium for 2 hours to identify differentially expressed genes. Chandran *et al.*<sup>25</sup> used 1 mM ammonium to treat rice seedlings for 3 hours to identify nitrogen-responsive genes.

**Table S1.** List of early ammonium nitrate-responsive genes in rice roots

| No. | Locus ID     |                | Fold change<br>(+ NH <sub>4</sub> NO <sub>3</sub> /-N) | Gene description                                             |
|-----|--------------|----------------|--------------------------------------------------------|--------------------------------------------------------------|
| 1   | Os02g0770800 | LOC_Os02g53130 | 65.8                                                   | Nitrate reductase [NAD(P)H]                                  |
| 2   | Os01g0860601 | LOC_Os01g64120 | 42.2                                                   | Ferredoxin, root R-B1                                        |
| 3   | Os01g0631200 | LOC_Os01g44050 | 32.3                                                   | Uroporphyrinogen-III C-methyltransferase                     |
| 4   | Os03g0609500 | LOC_Os03g41330 | 30.5                                                   | LOB domain-containing protein 38 (LBD38)                     |
| 5   | Os03g0684700 | LOC_Os03g48030 | 25.8                                                   | Unknown, HPP family protein                                  |
| 6   | Os01g0606900 | LOC_Os01g42190 | 20.5                                                   | DnaJ homolog subfamily B member 7                            |
| 7   | Os02g0728001 | LOC_Os02g49560 | 17.2                                                   | Basic leucine zipper 43-like (bZIP 43-like)                  |
| 8   | Os09g0484900 | LOC_Os09g31130 | 15.7                                                   | Dicarboxylate transporter, solute carrier 13 (SLC13)         |
| 9   | Os03g0445700 | LOC_Os03g33090 | 15.0                                                   | LOB domain-containing protein 37 (LBD37)                     |
| 10  | Os05g0525900 | LOC_Os05g45020 | 14.7                                                   | Zinc finger CCCH domain-containing protein 37                |
| 11  | Os09g0522200 | LOC_Os09g35030 | 14.7                                                   | Dehydration-responsive element-binding protein 1A (DREB1A)   |
| 12  | Os01g0915000 | LOC_Os01g68650 | 14.4                                                   | Unknown, DUF506                                              |
| 13  | Os05g0114400 | LOC_Os05g02390 | 14.0                                                   | Zinc finger protein, ZOS5-02                                 |
| 14  | Os04g0640900 | LOC_Os04g54830 | 13.4                                                   | Unknown                                                      |
| 15  | Os11g0184900 | LOC_Os11g08210 | 11.5                                                   | NAC domain-containing protein, NAC5                          |
| 16  | Os03g0233000 | LOC_Os03g13050 | 10.4                                                   | Calcium uniporter protein 4, mitochondrial                   |
| 17  | Os07g0119300 | LOC_Os07g02800 | 9.4                                                    | MYB family protein                                           |
| 18  | Os08g0452900 | LOC_Os08g35160 | 9.4                                                    | DnaJ/heat shock protein 40                                   |
| 19  | Os07g0589000 | LOC_Os07g40000 | 8.5                                                    | LOB domain-containing protein 37 (LBD37)                     |
| 20  | Os03g0784700 | LOC_Os03g57120 | 8.5                                                    | Ferredoxin--NADP reductase (FNR)                             |
| 21  | Os01g0699100 | LOC_Os01g50370 | 8.2                                                    | Mitogen-activated protein kinase kinase kinase 63 (MAPKKK63) |
| 22  | Os03g0764600 | LOC_Os03g55590 | 8.0                                                    | MYB family protein                                           |
| 23  | Os01g0357100 | LOC_Os01g25484 | 8.0                                                    | Nitrite reductase                                            |
| 24  | Os04g0480200 | LOC_Os04g40410 | 7.0                                                    | High-affinity nitrate transporter 2.2 (NAR2.2)               |
| 25  | Os03g0243100 | LOC_Os03g13950 | 6.5                                                    | Actin-depolymerizing factor 5 (ADF5)                         |
| 26  | Os09g0502500 | LOC_Os09g32570 | 6.5                                                    | Quinone-oxidoreductase homolog                               |
| 27  | Os01g0130900 | LOC_Os01g03980 | 6.2                                                    | Zinc finger protein ZIC 2                                    |
| 28  | Os05g0360400 | LOC_Os05g29710 | 5.9                                                    | E3 ubiquitin-protein ligase EL5-like                         |
| 29  | Os03g0126700 | LOC_Os03g03500 | 5.7                                                    | Unknown, heavy metal associated protein (HMA)                |
| 30  | Os07g0530600 | LOC_Os07g34640 | 5.4                                                    | Pyruvate, phosphate dikinase regulatory protein (PDRP1)      |
| 31  | Os11g0113700 | LOC_Os11g02240 | 5.4                                                    | CBL-interacting protein kinase 15 (CIPK15)                   |
|     | Os12g0113500 | LOC_Os12g02200 |                                                        | CBL-interacting protein kinase 14 (CIPK14)                   |
| 32  | Os08g0492500 | LOC_Os08g38460 | 5.3                                                    | Probable E3 ubiquitin-protein ligase XERICO                  |
| 33  | Os03g0148400 | LOC_Os03g05460 | 5.3                                                    | Unknown, DUF740                                              |
| 34  | Os02g0595900 | LOC_Os02g38230 | 5.2                                                    | High-affinity nitrate transporter 2.1 (NAR2.1)               |
| 35  | Os01g0646000 | LOC_Os01g45840 | 5.1                                                    | Pentatricopeptide repeat (PPR) protein                       |
| 36  | Os03g0114400 | LOC_Os03g02330 | 5.1                                                    | AAA-ATPase                                                   |
| 37  | Os07g0406300 | LOC_Os07g22350 | 5.1                                                    | Glucose-6-phosphate 1-dehydrogenase 2                        |



|    |              |                |     |                                                                                     |
|----|--------------|----------------|-----|-------------------------------------------------------------------------------------|
| 38 | Os05g0455300 | LOC_Os05g38130 | 5.0 | Unknown                                                                             |
| 39 | Os02g0535901 | LOC_Os02g33240 | 5.0 | Probable F-box protein                                                              |
| 40 | Os03g0823400 | LOC_Os03g60840 | 5.0 | Bowman-Birk type trypsin inhibitor                                                  |
| 41 | Os01g0752500 | LOC_Os01g54890 | 5.0 | Pathogenesis-related genes transcriptional activator (PTI5)                         |
| 42 | Os06g0633100 | LOC_Os06g42660 | 4.9 | Glutamine dumper 6 (GDU6)                                                           |
| 43 | Os05g0443700 | LOC_Os05g37150 | 4.8 | Unknown, Syntaxin 6 N-terminal domain-containing protein                            |
| 44 | Os01g0733200 | LOC_Os01g53220 | 4.7 | Heat stress transcription factor C-1b                                               |
| 45 | Os06g0566300 | LOC_Os06g37010 | 4.5 | Zinc transporter 10 (ZIP10)                                                         |
| 46 | Os11g0484500 | LOC_Os11g29400 | 4.3 | 6-Phosphogluconate dehydrogenase 2 (6PGDH2)                                         |
| 47 | Os03g0759000 | LOC_Os03g55180 | 4.2 | Unknown, DUF1336                                                                    |
| 48 | Os03g0233900 | LOC_Os03g13140 | 4.2 | Non-symbiotic hemoglobin 1 (HB1)                                                    |
| 49 | Os11g0100300 | LOC_Os11g01030 | 4.1 | Unknown                                                                             |
| 50 | Os01g0780800 | LOC_Os01g57240 | 4.1 | ULTRAPETALA 1 (ULT1), trithorax group factor                                        |
| 51 | Os01g0645900 | LOC_Os01g45830 | 4.1 | Molybdate transporter 2 (MOT2); sulfate transporter (SUL1)                          |
| 52 | Os05g0497800 | None           | 4.0 | Unknown                                                                             |
| 53 | Os03g0807900 | LOC_Os03g59320 | 3.9 | Unknown                                                                             |
| 54 | Os07g0583600 | LOC_Os07g39470 | 3.8 | Chitin-inducible gibberellin-responsive protein 2 (CIGR2), GRAS family protein      |
| 55 | Os02g0713700 | LOC_Os02g48320 | 3.6 | AT-hook motif nuclear-localized protein 25                                          |
| 56 | Os01g0948200 | LOC_Os01g71970 | 3.6 | Scarecrow-like protein 3; GRAS family protein                                       |
| 57 | Os01g0699600 | LOC_Os01g50420 | 3.6 | Mitogen-activated protein kinase kinase kinase 62 (MAPKKK62)                        |
| 58 | Os02g0623600 | LOC_Os02g41480 | 3.5 | Wall-associated receptor kinase 5                                                   |
| 59 | Os02g0775600 | LOC_Os02g53530 | 3.5 | Zinc finger protein 8                                                               |
| 60 | Os09g0418000 | LOC_Os09g25090 | 3.5 | CBL-interacting protein kinase 16 (CIPK16)                                          |
| 61 | Os02g0693000 | LOC_Os02g46620 | 3.5 | Unknown                                                                             |
| 62 | Os03g0776400 | LOC_Os03g56500 | 3.5 | Unknown                                                                             |
| 63 | Os05g0179100 | LOC_Os05g08620 | 3.3 | Unknown                                                                             |
| 64 | Os07g0509800 | LOC_Os07g32570 | 3.3 | Adenosine 5'-phosphosulfate reductase 1 (APR1)                                      |
| 65 | Os01g0314800 | LOC_Os01g21250 | 3.2 | Late embryogenesis abundant protein Lea5-D                                          |
| 66 | Os02g0205500 | LOC_Os02g11070 | 3.1 | 3-Ketoacyl-CoA synthase 11                                                          |
| 67 | Os04g0475600 | LOC_Os04g39980 | 3.1 | 2-Oxoglutarate-dependent-Fe (II) dioxygenase; dioxygenase for auxin oxidation (DAO) |
| 68 | Os10g0203000 | LOC_Os10g13550 | 3.1 | EF-hand domain calcium-binding protein                                              |
| 69 | Os01g0525800 | None           | 3.1 | NADH-ubiquinone oxidoreductase chain 1-like                                         |
| 70 | Os03g0196600 | LOC_Os03g10050 | 3.1 | Serine acetyltransferase 4 (SAT4)                                                   |
| 71 | Os02g0158000 | LOC_Os02g06330 | 3.0 | AP2/ERF transcription factor                                                        |
| 72 | Os02g0533700 | LOC_Os02g33060 | 3.0 | Unknown                                                                             |
| 73 | Os01g0705200 | LOC_Os01g50910 | 3.0 | Late embryogenesis abundant protein, group 3                                        |
| 74 | Os01g0266400 | LOC_Os01g16140 | 2.9 | Unknown                                                                             |
| 75 | Os01g0823900 | LOC_Os01g60860 | 2.9 | U-box domain-containing protein 16                                                  |
| 76 | Os09g0246500 | LOC_Os09g07150 | 2.9 | Unknown                                                                             |

|     |                  |                |     |                                                                           |
|-----|------------------|----------------|-----|---------------------------------------------------------------------------|
| 77  | Os01g0699400     | LOC_Os01g50400 | 2.9 | Mitogen-activated protein kinase kinase kinase 55 (MAPKKK55)              |
| 78  | Os07g0584100     | LOC_Os07g39520 | 2.9 | Mitogen-activated protein kinase kinase kinase 64 (MAPKKK64)              |
| 79  | Os05g0402900     | LOC_Os05g33400 | 2.9 | Xylanase inhibitor I-like (TAXI-I), basic 7S globulin                     |
| 80  | Os05g0194900     | LOC_Os05g10650 | 2.9 | ATP-dependent 6-phosphofructokinase 6                                     |
| 81  | Os01g0621900     | LOC_Os01g43370 | 2.9 | uORF-containing transcript                                                |
| 82  | Os03g0838900     | LOC_Os03g62240 | 2.9 | Unknown, mTERF domain-containing protein                                  |
| 83  | Os03g0275900     | LOC_Os03g16824 | 2.9 | Spotted leaf 11 (SPL11), U-box-ARM protein                                |
| 84  | Os05g0443500     | LOC_Os05g37140 | 2.9 | Ferredoxin-6                                                              |
| 85  | Os01g0700100     | LOC_Os01g50460 | 2.9 | Sugar transporter SWEET2b                                                 |
| 86  | Os04g0523100     | LOC_Os04g44210 | 2.9 | Unknown, DUF3755                                                          |
| 87  | Os03g0175200     | LOC_Os03g07890 | 2.8 | Solute carrier family 25 member 44, mitochondrial carrier protein         |
| 88  | Os04g0567800     | LOC_Os04g47990 | 2.8 | Dof zinc finger protein DOF4.6                                            |
| 89  | Os03g0292600     | None           | 2.8 | Unknown                                                                   |
| 90  | Os01g0212700     | LOC_Os01g11460 | 2.8 | RING-H2 finger protein ATL39                                              |
| 91  | Os06g0166400     | LOC_Os06g07030 | 2.8 | Ethylene-responsive transcription factor RAP2-9                           |
| 92  | Os05g0545400     | LOC_Os05g46760 | 2.7 | Mitogen-activated protein kinase kinase kinase 69 (MAPKKK69)              |
| 93  | Os07g0593000     | LOC_Os07g40300 | 2.7 | Zinc finger protein 7 (ZFP7)                                              |
| 94  | Os04g0450900     | LOC_Os04g37790 | 2.7 | Myosin heavy chain, SMC chromosome segregation protein                    |
| 95  | Os08g0473900     | LOC_Os08g36910 | 2.7 | Alpha-amylase isozyme 3D (AMY3D)                                          |
| 96  | Os01g0292200     | LOC_Os01g18800 | 2.7 | CBL-interacting protein kinase 1 (CIPK1)                                  |
| 97  | Os07g0672600     | LOC_Os07g47540 | 2.7 | LURP-one-related (LOR) 2-like, Tubby C2                                   |
| 98  | Os08g0207500     | LOC_Os08g10630 | 2.6 | Zinc transporter 4 (ZIP4)                                                 |
| 99  | Os09g0103400     | LOC_Os09g01610 | 2.6 | WASH complex subunit CCDC53 homolog                                       |
| 100 | Os02g0530300     | LOC_Os02g32840 | 2.6 | Zinc finger A20, AN1 domain-containing stress-associated protein 5 (SAP5) |
| 101 | Os05g0560200     | LOC_Os05g48650 | 2.5 | Seed dormancy control (DOG1), transcription factor-like protein           |
| 102 | Os09g0400700     | LOC_Os09g23590 | 2.5 | Unknown                                                                   |
| 103 | Os03g0242300     | LOC_Os03g13870 | 2.5 | Formin-like protein 5                                                     |
| 104 | Os03g0297600     | LOC_Os03g18600 | 2.5 | Abscisic acid receptor PYL4                                               |
| 105 | Os06g0208700     | LOC_Os06g10650 | 2.5 | Plant and fungi atypical dual-specificity phosphatase (PFA-DSP)           |
| 106 | Os02g0575700     | LOC_Os02g36590 | 2.5 | Loricrin                                                                  |
| 107 | Os07g0592600     | LOC_Os07g40290 | 2.5 | Indole-3-acetic acid-amido synthetase GH3.8                               |
| 108 | Os03g0230300     | LOC_Os03g12820 | 2.5 | RST and PARP domain-containing SRO (similar to RCD one) protein (SRO2)    |
| 109 | Os02g0608600     | LOC_Os02g39570 | 2.4 | Acetolactate synthase small subunit 2                                     |
| 110 | Os04g0583200     | LOC_Os04g49370 | 2.4 | Unknown                                                                   |
| 111 | Os01g0797600     | LOC_Os01g58420 | 2.4 | Ethylene-responsive transcription factor 8                                |
| 112 | Os01g0908200     | LOC_Os01g68020 | 2.4 | BTB/POZ and TAZ domain-containing protein 2                               |
| 113 | Os02g0687200     | LOC_Os02g46210 | 2.3 | Unknown, DUF581                                                           |
| 114 | Os.22947.1.S1_at | LOC_Os04g06080 | 2.3 | Retrotransposon protein                                                   |
| 115 | Os04g0649500     | LOC_Os04g55600 | 2.3 | Unknown                                                                   |

|     |              |                |     |                                                                                                               |
|-----|--------------|----------------|-----|---------------------------------------------------------------------------------------------------------------|
| 116 | Os02g0771100 | LOC_Os02g53140 | 2.3 | E3 ubiquitin-protein ligase COP1                                                                              |
| 117 | Os01g0504100 | LOC_Os01g31940 | 2.3 | Purine permease 4                                                                                             |
| 118 | Os01g0787400 | LOC_Os01g57740 | 2.3 | Unknown                                                                                                       |
| 119 | Os05g0181800 | None           | 2.3 | Unknown                                                                                                       |
| 120 | Os07g0602900 | LOC_Os07g41160 | 2.3 | Ninja-family protein                                                                                          |
| 121 | Os04g0649600 | LOC_Os04g55610 | 2.3 | Unknown                                                                                                       |
| 122 | Os10g0546400 | LOC_Os10g39920 | 2.3 | Cyclin-dependent protein kinase inhibitor SMR1                                                                |
| 123 | Os02g0689200 | LOC_Os02g46380 | 2.3 | Purine permease 11                                                                                            |
| 124 | Os01g0747300 | LOC_Os01g54340 | 2.2 | Unknown, DUF506                                                                                               |
| 125 | Os02g0160200 | LOC_Os02g06520 | 2.2 | F-box protein                                                                                                 |
| 126 | Os05g0454500 | LOC_Os05g38040 | 2.2 | Unknown                                                                                                       |
| 127 | Os02g0748300 | LOC_Os02g51350 | 2.2 | F-box/kelch-repeat protein                                                                                    |
| 128 | Os01g0699500 | LOC_Os01g50410 | 2.2 | Mitogen-activated protein kinase kinase kinase 70 (MAPKKK70)                                                  |
| 129 | Os07g0538400 | LOC_Os07g35390 | 2.2 | Cysteine-rich receptor-like protein kinase 25                                                                 |
| 130 | Os10g0541200 | LOC_Os10g39540 | 2.2 | Phosphatase 2C 47                                                                                             |
| 131 | Os03g0218400 | LOC_Os03g11900 | 2.2 | Sugar transport protein 13                                                                                    |
| 132 | Os04g0405300 | LOC_Os04g33240 | 2.2 | Phytoalexin momilactone A synthase-like                                                                       |
| 133 | Os04g0671200 | LOC_Os04g57550 | 2.2 | Polyamine oxidase 2                                                                                           |
| 134 | Os02g0668500 | LOC_Os02g44820 | 2.1 | Ganglioside-induced differentiation-associated protein 2, Sec14p-like lipid-binding domain-containing protein |
| 135 | Os01g0101700 | LOC_Os01g01160 | 2.1 | Chaperone protein dnaJ 20, dnaJ/Hsp40                                                                         |
| 136 | Os07g0685700 | LOC_Os07g48630 | 2.1 | ETHYLENE INSENSITIVE 3-like 1 protein, EIL2                                                                   |
| 137 | Os07g0225300 | LOC_Os07g12340 | 2.1 | NAC domain-containing protein 67                                                                              |
| 138 | Os01g0812200 | LOC_Os01g59690 | 2.1 | F-box protein                                                                                                 |
| 139 | Os04g0528800 | LOC_Os04g44650 | 2.1 | Ferredoxin-thioredoxin reductase                                                                              |
| 140 | Os04g0460600 | LOC_Os04g38720 | 2.1 | NAC domain-containing protein 92                                                                              |
| 141 | Os05g0429000 | LOC_Os05g35440 | 2.1 | Serine hydroxymethyltransferase 7 (SHMT)                                                                      |
| 142 | Os06g0202700 | LOC_Os06g10130 | 2.1 | Unknown                                                                                                       |
| 143 | Os08g0446800 | LOC_Os08g34700 | 2.1 | GLUTAMINE DUMPER 2                                                                                            |
| 144 | Os10g0576600 | LOC_Os10g42610 | 2.1 | Tetratricopeptide repeat (TPR) protein                                                                        |
| 145 | Os01g0733001 | LOC_Os01g53210 | 2.1 | Putative metal transporter Nrmp3                                                                              |
| 146 | Os09g0522000 | LOC_Os09g35010 | 2.1 | Dehydration-responsive element-binding protein 1B (DREB1B)                                                    |
| 147 | Os02g0767400 | LOC_Os02g52850 | 2.1 | G-type lectin S-receptor-like serine/threonine-protein kinase                                                 |
| 148 | Os04g0648900 | LOC_Os04g55520 | 2.1 | Ethylene-responsive transcription factor ERF008                                                               |
| 149 | Os02g0324700 | LOC_Os02g21920 | 2.1 | Unknown                                                                                                       |
| 150 | Os06g0107800 | LOC_Os06g01860 | 2.0 | B3 DNA binding domain-containing protein                                                                      |
| 151 | Os02g0768300 | LOC_Os02g52930 | 2.0 | WALLS ARE THIN1 (WAT1)-related protein, drug/metabolite transporter (DMT) family protein                      |
| 152 | Os03g0710000 | LOC_Os03g50210 | 2.0 | Unknown                                                                                                       |
| 153 | Os02g0605900 | LOC_Os02g39330 | 2.0 | Chitinase 6 (Cht6)                                                                                            |
| 154 | Os05g0450600 | LOC_Os05g37800 | 2.0 | Unknown, DUF740                                                                                               |

|     |              |                |      |                                                                                                    |
|-----|--------------|----------------|------|----------------------------------------------------------------------------------------------------|
| 155 | Os10g0560000 | LOC_Os10g41060 | 2.0  | VAN3-binding protein, Auxin canalization, plant pleckstrin homology-like domain-containing protein |
| 156 | Os01g0667900 | LOC_Os01g47760 | 2.0  | Monothiol glutaredoxin-S5 (GRXS5)                                                                  |
| 157 | Os01g0612900 | LOC_Os01g42730 | 2.0  | GDSL esterase/lipase                                                                               |
| 158 | Os03g0247900 | LOC_Os03g14370 | 2.0  | ACT domain-containing protein (ACR8)                                                               |
| 159 | Os05g0192100 | LOC_Os05g10370 | -2.0 | Haloacid dehalogenase (HAD)-like, acid phosphatase                                                 |
| 160 | Os10g0572300 | LOC_Os10g42190 | -2.1 | Plant intracellular Ras-group-related LRR protein 5 (PIRL5)                                        |
| 161 | Os01g0196300 | LOC_Os01g09990 | -2.1 | Basic helix-loop-helix domain-containing protein (bHLH25)                                          |
| 162 | Os07g0154100 | LOC_Os07g05940 | -2.7 | 9-cis-epoxycarotenoid dioxygenase (NCED)                                                           |

---

Total RNA extracted from roots of nitrogen-starved 17-day-old rice seedlings (-N) or treated with 1.43 mM ammonium nitrate for 30 min was used for microarray analysis. Quantitative RT-PCR analysis was used to verify the expression of genes identified in the microarray data. The expression of genes listed here was up- or down-regulated by ammonium nitrate (1.43 mM, 30 min) for more than 2-fold in the qRT-PCR analysis.

---

**Table S2.** KEGG pathway enrichment analysis of genes (17 genes with KO) rapidly induced by ammonium nitrate (1.43 mM, 30 min) in rice roots

| <b>Pathway (ID)</b>                                 | <b>Gene Identifier</b> | <b>Gene Description</b>                                                                  |
|-----------------------------------------------------|------------------------|------------------------------------------------------------------------------------------|
| Photosynthesis<br>(ko00195)                         | Os01g0860601           | Ferredoxin, root R-B1                                                                    |
|                                                     | Os03g0784700           | Ferredoxin--NADP reductase (FNR)                                                         |
|                                                     | Os05g0443500           | Ferredoxin VI, chloroplast precursor                                                     |
| Nitrogen metabolism<br>(ko00910)                    | Os02g0770800           | Nitrate reductase                                                                        |
|                                                     | Os01g0357100           | Nitrite reductase                                                                        |
| Sulfur metabolism<br>(ko00920)                      | Os07g0509800           | Adenylyl-sulfate reductase                                                               |
|                                                     | Os03g0196600           | Serine O-acetyltransferase                                                               |
| Carbon metabolism<br>(ko01200)                      | Os07g0406300           | Glucose-6-phosphate 1-dehydrogenase                                                      |
|                                                     | Os11g0484500           | 6-Phosphogluconate dehydrogenase                                                         |
|                                                     | Os03g0196600           | Serine O-acetyltransferase                                                               |
|                                                     | Os05g0429000           | Glycine hydroxymethyltransferase                                                         |
| Pentose phosphate<br>pathway (ko00030)              | Os07g0406300           | Glucose-6-phosphate 1-dehydrogenase                                                      |
|                                                     | Os11g0484500           | 6-Phosphogluconate dehydrogenase                                                         |
| Glutathione metabolism<br>(ko00480)                 | Os07g0406300           | Glucose-6-phosphate 1-dehydrogenase                                                      |
|                                                     | Os11g0484500           | 6-Phosphogluconate dehydrogenase                                                         |
| C5-branched dibasic<br>acid metabolism<br>(ko00660) | Os02g0608600           | ACT domain containing protein ACR8, similar to acetolactate synthase I/III small subunit |

**Table S3.** Gene ontology (GO) enrichment analysis of genes rapidly induced by ammonium nitrate (1.43 mM, 30 min) in rice roots

| <b>Locus ID</b>                                                                   | <b>Gene Description</b>                                                                   |
|-----------------------------------------------------------------------------------|-------------------------------------------------------------------------------------------|
| <b>Biological Process/regulation of transcription, DNA-dependent (GO:0006355)</b> |                                                                                           |
| Os02g0158000 LOC_Os02g06330                                                       | AP2/ERF transcription factor                                                              |
| Os06g0166400 LOC_Os06g07030                                                       | Ethylene-responsive transcription factor RAP2-9                                           |
| Os01g0733200 LOC_Os01g53220                                                       | Heat stress transcription factor C-1b                                                     |
| Os01g0797600 LOC_Os01g58420                                                       | Ethylene-responsive transcription factor 8                                                |
| Os01g0752500 LOC_Os01g54890                                                       | Pathogenesis-related genes transcriptional activator (PTI5); AP2/ERF transcription factor |
| Os04g0648900 LOC_Os04g55520                                                       | Ethylene-responsive transcription factor ERF008                                           |
| Os02g0728001 LOC_Os02g49560                                                       | Basic leucine zipper 43-like (bZIP 43-like)                                               |
| Os06g0107800 LOC_Os06g01860                                                       | B3 DNA binding domain-containing protein                                                  |
| Os09g0522200 LOC_Os09g35030                                                       | Dehydration-responsive element-binding protein 1A (DREB1A)                                |
| Os09g0522000 LOC_Os09g35010                                                       | Dehydration-responsive element-binding protein 1B (DREB1B)                                |
| Os01g0908200 LOC_Os01g68020                                                       | BTB/POZ and TAZ domain-containing protein 2                                               |
| Os01g0292200 LOC_Os01g18800                                                       | CBL-interacting protein kinase 1 (CIPK1)                                                  |
| <b>Biological Process/protein amino acid phosphorylation (GO:0006468)</b>         |                                                                                           |
| Os07g0584100 LOC_Os07g39520                                                       | Serine/threonine-protein kinase WNK5                                                      |
| Os02g0623600 LOC_Os02g41480                                                       | Wall-associated receptor kinase 5                                                         |
| Os01g0699500 LOC_Os01g50410                                                       | Mitogen-activated protein kinase kinasekinase NPKL3                                       |
| Os01g0699400 LOC_Os01g50400                                                       | Mitogen-activated protein kinase kinasekinase NPKL2                                       |
| Os01g0699600 LOC_Os01g50420                                                       | Mitogen-activated protein kinase kinasekinase NPKL4                                       |
| Os09g0418000 LOC_Os09g25090                                                       | CBL-interacting protein kinase 16 (CIPK16)                                                |
| Os12g0113500 LOC_Os12g02200                                                       | CBL-interacting protein kinase 14 (CIPK14)                                                |
| Os01g0699100 LOC_Os01g50370                                                       | Mitogen-activated protein kinase kinase kinase NPK1                                       |
| Os07g0538400 LOC_Os07g35390                                                       | Cysteine-rich receptor-like protein kinase 25                                             |
| Os05g0545400 LOC_Os05g46760                                                       | Mitogen-activated protein kinase kinasekinase 2                                           |
| Os11g0113700 LOC_Os11g02240                                                       | CBL-interacting protein kinase 15 (CIPK15)                                                |
| <b>Biological Process/signal transduction (GO:0007165)</b>                        |                                                                                           |
| Os01g0292200 LOC_Os01g18800                                                       | CBL-interacting protein kinase 1 (CIPK1)                                                  |
| Os12g0113500 LOC_Os12g02200                                                       | CBL-interacting protein kinase 14 (CIPK14)                                                |
| Os11g0113700 LOC_Os11g02240                                                       | CBL-interacting protein kinase 15 (CIPK15)                                                |
| Os04g0450900 LOC_Os04g37790                                                       | Myosin heavy chain, SMC chromosome segregation protein                                    |
| Os09g0418000 LOC_Os09g25090                                                       | CBL-interacting protein kinase 16 (CIPK16)                                                |
| <b>Molecular Function/transcription factor activity (GO:0003700)</b>              |                                                                                           |
| Os06g0166400 LOC_Os06g07030                                                       | Ethylene-responsive transcription factor RAP2-9                                           |
| Os02g0158000 LOC_Os02g06330                                                       | AP2/ERF transcription factor                                                              |

|              |                |                                                                                           |
|--------------|----------------|-------------------------------------------------------------------------------------------|
| Os01g0733200 | LOC_Os01g53220 | Heat stress transcription factor C-1b                                                     |
| Os01g0797600 | LOC_Os01g58420 | Ethylene-responsive transcription factor 8                                                |
| Os01g0752500 | LOC_Os01g54890 | Pathogenesis-related genes transcriptional activator (PTI5); AP2/ERF transcription factor |
| Os04g0648900 | LOC_Os04g55520 | Ethylene-responsive transcription factor ERF008                                           |
| Os02g0728001 | LOC_Os02g49560 | Basic leucine zipper 43-like (bZIP 43-like)                                               |
| Os09g0522200 | LOC_Os09g35030 | Dehydration-responsive element-binding protein 1A (DREB1A)                                |
| Os09g0522000 | LOC_Os09g35010 | Dehydration-responsive element-binding protein 1B (DREB1B)                                |

---

**Cellular Component/nucleus (GO:0005634)**

|              |                |                                                                                           |
|--------------|----------------|-------------------------------------------------------------------------------------------|
| Os01g0780800 | LOC_Os01g57240 | ULTRAPETALA 1 (ULT1), trithorax group factor                                              |
| Os02g0158000 | LOC_Os02g06330 | AP2/ERF transcription factor                                                              |
| Os06g0166400 | LOC_Os06g07030 | Ethylene-responsive transcription factor RAP2-9                                           |
| Os01g0733200 | LOC_Os01g53220 | Heat stress transcription factor C-1b                                                     |
| Os01g0196300 | LOC_Os01g09990 | Helix-loop-helix domain-containing protein                                                |
| Os01g0797600 | LOC_Os01g58420 | Ethylene-responsive transcription factor 8                                                |
| Os01g0752500 | LOC_Os01g54890 | Pathogenesis-related genes transcriptional activator (PTI5); AP2/ERF transcription factor |
| Os04g0648900 | LOC_Os04g55520 | Ethylene-responsive transcription factor ERF008                                           |
| Os02g0728001 | LOC_Os02g49560 | Basic leucine zipper 43-like (bZIP 43-like)                                               |
| Os03g0230300 | LOC_Os03g12820 | RST and PARP domain-containing SRO (similar to RCD one) protein (SRO2)                    |
| Os09g0522200 | LOC_Os09g35030 | Dehydration-responsive element-binding protein 1A (DREB1A)                                |
| Os07g0685700 | LOC_Os07g48630 | ETHYLENE INSENSITIVE 3-like 1 protein, EIL2                                               |
| Os09g0522000 | LOC_Os09g35010 | Dehydration-responsive element-binding protein 1B (DREB1B)                                |
| Os01g0908200 | LOC_Os01g68020 | BTB/POZ and TAZ domain-containing protein 2                                               |

---

**Table S4.** List of genes commonly induced by ammonium nitrate and glutamine

| Locus ID     |                | Fold change*                    |     | Gene description                                           |
|--------------|----------------|---------------------------------|-----|------------------------------------------------------------|
|              |                | NH <sub>4</sub> NO <sub>3</sub> | Gln |                                                            |
| Os03g0445700 | LOC_Os03g33090 | 15                              | 2.7 | LOB domain-containing protein 37 (LBD37)                   |
| Os09g0522200 | LOC_Os09g35030 | 14.7                            | 4   | Dehydration-responsive element-binding protein 1A (DREB1A) |
| Os05g0114400 | LOC_Os05g02390 | 14                              | 5.4 | Zinc finger protein, ZOS5-02                               |
| Os11g0184900 | LOC_Os11g08210 | 11.5                            | 4   | NAC domain-containing protein, NAC5                        |
| Os07g0119300 | LOC_Os07g02800 | 9.4                             | 2.6 | Unknown, MYB family protein                                |
| Os07g0589000 | LOC_Os07g40000 | 8.5                             | 2.3 | LOB domain-containing protein 37 (LBD37)                   |
| Os01g0699100 | LOC_Os01g50370 | 8.2                             | 2.3 | Mitogen-activated protein kinase kinase kinase (NPK1)      |
| Os03g0823400 | LOC_Os03g60840 | 5                               | 3.5 | Bowman-Birk type trypsin inhibitor                         |
| Os06g0633100 | LOC_Os06g42660 | 4.9                             | 3.6 | Glutamine dumper 6                                         |
| Os02g0205500 | LOC_Os02g11070 | 3.1                             | 2.2 | 3-Ketoacyl-CoA synthase 11                                 |
| Os05g0194900 | LOC_Os05g10650 | 2.9                             | 2.4 | ATP-dependent 6-phosphofructokinase 6                      |
| Os05g0402900 | LOC_Os05g33400 | 2.9                             | 2.4 | Xylanase inhibitor I-like, basic 7S globulin               |
| Os02g0687200 | LOC_Os02g46210 | 2.3                             | 2.6 | Unknown, DUF581                                            |
| Os08g0446800 | LOC_Os08g34700 | 2.1                             | 2   | GLUTAMINE DUMPER 2                                         |

Genes induced by glutamine (2.5 mM, 30 min) were derived from Kan *et al.*<sup>35</sup>. Genes induced by ammonium nitrate (1.43 mM, 30 min) were from this study. \*Fold change indicates the ratio of +NH<sub>4</sub>NO<sub>3</sub> or +Gln/-N.



**Table S5.** List of genes commonly induced by ammonium nitrate and glutamate

| Locus ID     |                | Fold change                     |     | Gene description                                                                  |
|--------------|----------------|---------------------------------|-----|-----------------------------------------------------------------------------------|
|              |                | NH <sub>4</sub> NO <sub>3</sub> | Glu |                                                                                   |
| Os09g0484900 | LOC_Os09g31130 | 15.7                            | 2.3 | Dicarboxylate transporter, solute carrier 13 (SLC13)                              |
| Os01g0915000 | LOC_Os01g68650 | 14.4                            | 2.7 | Unknown, DUF506                                                                   |
| Os11g0184900 | LOC_Os11g08210 | 11.5                            | 2   | NAC domain-containing protein, NAC5                                               |
| Os07g0119300 | LOC_Os07g02800 | 9.4                             | 2.1 | Unknown, MYB family protein                                                       |
| Os07g0589000 | LOC_Os07g40000 | 8.5                             | 2   | LOB domain-containing protein 37 (LBD37)                                          |
| Os08g0492500 | LOC_Os08g38460 | 5.3                             | 2   | Probable E3 ubiquitin-protein ligase XERICO                                       |
| Os03g0823400 | LOC_Os03g60840 | 5                               | 4.7 | Bowman-Birk type trypsin inhibitor                                                |
| Os07g0583600 | LOC_Os07g39470 | 3.8                             | 2.1 | Chitin-inducible gibberellin-responsive protein 2 (CIGR2),<br>GRAS family protein |
| Os02g0205500 | LOC_Os02g11070 | 3.1                             | 2.6 | 3-Ketoacyl-CoA synthase 11                                                        |
| Os01g0705200 | LOC_Os01g50910 | 3                               | 3.7 | Late embryogenesis abundant protein, group 3                                      |
| Os05g0402900 | LOC_Os05g33400 | 2.9                             | 4.3 | Xylanase inhibitor I-like, basic 7S globulin                                      |
| Os08g0473900 | LOC_Os08g36910 | 2.7                             | 2.7 | Alpha-amylase isozyme 3D (AMY3D)                                                  |
| Os07g0592600 | LOC_Os07g40290 | 2.5                             | 2.8 | Indole-3-acetic acid-amido synthetase GH3.8                                       |
| Os02g0687200 | LOC_Os02g46210 | 2.3                             | 3.1 | Unknown, DUF581                                                                   |
| Os03g0218400 | LOC_Os03g11900 | 2.2                             | 2.2 | Sugar transport protein 13                                                        |
| Os02g0605900 | LOC_Os02g39330 | 2                               | 3.4 | Chitinase 6 (Cht6)                                                                |

Genes induced by glutamate (2.5 mM, 30 min) were derived from Kan *et al.*<sup>36</sup>. Genes induced by ammonium nitrate (1.43 mM, 30 min) were from this study. \*Fold change indicates the ratio of +NH<sub>4</sub>NO<sub>3</sub> or +Glu/-N.

**Table S6.** List of genes commonly induced by high and low concentrations of ammonium nitrate in rice roots

|     | Locus ID     | Fold change*   | Gene description |                                                            |
|-----|--------------|----------------|------------------|------------------------------------------------------------|
| 1.  | Os03g0609500 | LOC_Os03g41330 | 30.5             | LOB domain-containing protein 38 (LBD38)                   |
| 2.  | Os09g0522200 | LOC_Os09g35030 | 14.7             | Dehydration-responsive element-binding protein 1A (DREB1A) |
| 3.  | Os11g0184900 | LOC_Os11g08210 | 11.5             | NAC domain-containing protein, NAC5                        |
| 4.  | Os07g0119300 | LOC_Os07g02800 | 9.4              | MYB family protein                                         |
| 5.  | Os02g0595900 | LOC_Os02g38230 | 5.2              | High-affinity nitrate transporter 2.1 (NAR2.1)             |
| 6.  | Os03g0776400 | LOC_Os03g56500 | 3.5              | Unknown                                                    |
| 7.  | Os03g0838900 | LOC_Os03g62240 | 2.9              | Unknown, mTERF domain-containing protein                   |
| 8.  | Os06g0166400 | LOC_Os06g07030 | 2.8              | Ethylene-responsive transcription factor RAP2-9            |
| 9.  | Os05g0454500 | LOC_Os05g38040 | 2.2              | Unknown                                                    |
| 10. | Os04g0528800 | LOC_Os04g44650 | 2.1              | Ferredoxin-thioredoxin reductase                           |
| 11. | Os02g0770800 | LOC_Os02g53130 | 65.8             | Nitrate reductase [NAD(P)H]                                |
| 12. | Os01g0860601 | LOC_Os01g64120 | 42.2             | Ferredoxin, root R-B1                                      |
| 13. | Os01g0631200 | LOC_Os01g44050 | 32.3             | Uroporphyrinogen-III C-methyltransferase                   |
| 14. | Os03g0684700 | LOC_Os03g48030 | 25.8             | Unknown, HPP family protein                                |
| 15. | Os01g0915000 | LOC_Os01g68650 | 14.4             | Unknown, DUF506                                            |
| 16. | Os04g0640900 | LOC_Os04g54830 | 13.4             | Unknown                                                    |
| 17. | Os03g0233000 | LOC_Os03g13050 | 10.4             | Calcium uniporter protein 4, mitochondrial                 |
| 18. | Os03g0784700 | LOC_Os03g57120 | 8.5              | Ferredoxin--NADP reductase (FNR)                           |
| 19. | Os03g0764600 | LOC_Os03g55590 | 8                | MYB family protein                                         |
| 20. | Os01g0357100 | LOC_Os01g25484 | 8                | Nitrite reductase                                          |
| 21. | Os07g0406300 | LOC_Os07g22350 | 5.1              | Glucose-6-phosphate 1-dehydrogenase 2                      |
| 22. | Os11g0484500 | LOC_Os11g29400 | 4.3              | 6-Phosphogluconate dehydrogenase 2 (6PGDH2)                |
| 23. | Os03g0233900 | LOC_Os03g13140 | 4.2              | Non-symbiotic hemoglobin 1 (HB1)                           |
| 24. | Os01g0621900 | LOC_Os01g43370 | 2.9              | uORF-containing transcript                                 |
| 25. | Os05g0443500 | LOC_Os05g37140 | 2.9              | Ferredoxin-6                                               |
| 26. | Os02g0575700 | LOC_Os02g36590 | 2.5              | Loricrin                                                   |
| 27. | Os01g0747300 | LOC_Os01g54340 | 2.2              | Unknown, DUF506                                            |

Genes induced by high concentration ammonium nitrate (20 mM ammonium and 40 mM nitrate, 2h) were derived from Obertello *et al.*<sup>40</sup>. Genes induced by low concentration ammonium nitrate (1.43 mM, 30 min) were from this study.

\*Fold change indicates the ratio of +NH<sub>4</sub>NO<sub>3</sub>/-N derived from this study.

**Table S7.** List of genes commonly induced by ammonium and ammonium nitrate in rice roots

|     | Locus ID     | Fold change*   | Gene description |                                                       |
|-----|--------------|----------------|------------------|-------------------------------------------------------|
| 1.  | Os02g0770800 | LOC_Os02g53130 | 65.8             | Nitrate reductase [NAD(P)H]                           |
| 2.  | Os01g0860601 | LOC_Os01g64120 | 42.2             | Ferredoxin, root R-B1                                 |
| 3.  | Os01g0631200 | LOC_Os01g44050 | 32.3             | Uroporphyrinogen-III C-methyltransferase              |
| 4.  | Os03g0684700 | LOC_Os03g48030 | 25.8             | Unknown, HPP family protein                           |
| 5.  | Os01g0915000 | LOC_Os01g68650 | 14.4             | Unknown, DUF506                                       |
| 6.  | Os04g0640900 | LOC_Os04g54830 | 13.4             | Unknown                                               |
| 7.  | Os03g0233000 | LOC_Os03g13050 | 10.4             | Calcium uniporter protein 4, mitochondrial            |
| 8.  | Os03g0784700 | LOC_Os03g57120 | 8.5              | Ferredoxin--NADP reductase (FNR)                      |
| 9.  | Os03g0764600 | LOC_Os03g55590 | 8                | MYB family protein                                    |
| 10. | Os01g0357100 | LOC_Os01g25484 | 8                | Nitrite reductase                                     |
| 11. | Os07g0406300 | LOC_Os07g22350 | 5.1              | Glucose-6-phosphate 1-dehydrogenase 2                 |
| 12. | Os11g0484500 | LOC_Os11g29400 | 4.3              | 6-Phosphogluconate dehydrogenase 2 (6PGDH2)           |
| 13. | Os03g0233900 | LOC_Os03g13140 | 4.2              | Non-symbiotic hemoglobin 1 (HB1)                      |
| 14. | Os01g0621900 | LOC_Os01g43370 | 2.9              | uORF-containing transcript                            |
| 15. | Os05g0443500 | LOC_Os05g37140 | 2.9              | Ferredoxin-6                                          |
| 16. | Os02g0575700 | LOC_Os02g36590 | 2.5              | Loricrin                                              |
| 17. | Os01g0747300 | LOC_Os01g54340 | 2.2              | Unknown, DUF506                                       |
| 18. | Os01g0606900 | LOC_Os01g42190 | 20.5             | DnaJ homolog subfamily B member 7                     |
| 19. | Os03g0445700 | LOC_Os03g33090 | 15               | LOB domain-containing protein 37 (LBD37)              |
| 20. | Os05g0525900 | LOC_Os05g45020 | 14.7             | Zinc finger CCCH domain-containing protein 37         |
| 21. | Os05g0114400 | LOC_Os05g02390 | 14               | Zinc finger protein, ZOS5-02                          |
| 22. | Os08g0452900 | LOC_Os08g35160 | 9.4              | DnaJ/heat shock protein 40 (Hsp40)                    |
| 23. | Os07g0589000 | LOC_Os07g40000 | 8.5              | LOB domain-containing protein 37 (LBD37)              |
| 24. | Os01g0699100 | LOC_Os01g50370 | 8.2              | Mitogen-activated protein kinase kinase kinase (NPK1) |
| 25. | Os03g0243100 | LOC_Os03g13950 | 6.5              | Actin-depolymerizing factor 5 (ADF5)                  |
| 26. | Os09g0502500 | LOC_Os09g32570 | 6.5              | Quinone-oxidoreductase homolog                        |
| 27. | Os01g0130900 | LOC_Os01g03980 | 6.2              | Zinc finger protein ZIC 2                             |
| 28. | Os03g0114400 | LOC_Os03g02330 | 5.1              | AAA-ATPase                                            |
| 29. | Os06g0633100 | LOC_Os06g42660 | 4.9              | Glutamine dumper 6                                    |
| 30. | Os03g0807900 | LOC_Os03g59320 | 3.9              | Unknown                                               |
| 31. | Os05g0194900 | LOC_Os05g10650 | 2.9              | ATP-dependent 6-phosphofructokinase 6                 |
| 32. | Os01g0212700 | LOC_Os01g11460 | 2.8              | RING-H2 finger protein ATL39                          |
| 33. | Os08g0473900 | LOC_Os08g36910 | 2.7              | Alpha-amylase isozyme 3D (AMY3D)                      |
| 34. | Os06g0208700 | LOC_Os06g10650 | 2.5              | Tyrosine phosphatase family protein                   |
| 35. | Os04g0583200 | LOC_Os04g49370 | 2.4              | Unknown                                               |
| 36. | Os02g0748300 | LOC_Os02g51350 | 2.2              | F-box/kelch-repeat protein                            |
| 37. | Os02g0324700 | LOC_Os02g21920 | 2.1              | Unknown                                               |

38. Os02g0768300      LOC\_Os02g52930      2      WALLS ARE THIN1 (WAT1)-related protein,  
drug/metabolite transporter (DMT) family protein

Genes induced by ammonium (1 mM, 3h) were derived from Chandran *et al.*<sup>25</sup>. Genes induced by ammonium nitrate (1.43 mM, 30 min) were from this study. \*Fold change indicates the ratio of +NH<sub>4</sub>NO<sub>3</sub>/-N derived from this study.

**Table S8.** List of genes commonly induced by ammonium and ammonium nitrate in rice roots

|     | Locus ID                         | Fold change* | Gene description                            |
|-----|----------------------------------|--------------|---------------------------------------------|
| 1.  | Os02g0770800      LOC_Os02g53130 | 65.8         | Nitrate reductase [NAD(P)H]                 |
| 2.  | Os01g0860601      LOC_Os01g64120 | 42.2         | Ferredoxin, root R-B1                       |
| 3.  | Os01g0631200      LOC_Os01g44050 | 32.3         | Uroporphyrinogen-III C-methyltransferase    |
| 4.  | Os03g0684700      LOC_Os03g48030 | 25.8         | Unknown, HPP family protein                 |
| 5.  | Os01g0915000      LOC_Os01g68650 | 14.4         | Unknown, DUF506                             |
| 6.  | Os04g0640900      LOC_Os04g54830 | 13.4         | Unknown                                     |
| 7.  | Os03g0233000      LOC_Os03g13050 | 10.4         | Calcium uniporter protein 4, mitochondrial  |
| 8.  | Os03g0784700      LOC_Os03g57120 | 8.5          | Ferredoxin--NADP reductase (FNR)            |
| 9.  | Os03g0764600      LOC_Os03g55590 | 8            | MYB family protein                          |
| 10. | Os01g0357100      LOC_Os01g25484 | 8            | Nitrite reductase                           |
| 11. | Os07g0406300      LOC_Os07g22350 | 5.1          | Glucose-6-phosphate 1-dehydrogenase 2       |
| 12. | Os11g0484500      LOC_Os11g29400 | 4.3          | 6-Phosphogluconate dehydrogenase 2 (6PGDH2) |
| 13. | Os03g0233900      LOC_Os03g13140 | 4.2          | Non-symbiotic hemoglobin 1 (HB1)            |
| 14. | Os01g0621900      LOC_Os01g43370 | 2.9          | uORF-containing transcript                  |
| 15. | Os05g0443500      LOC_Os05g37140 | 2.9          | Ferredoxin-6                                |
| 16. | Os02g0575700      LOC_Os02g36590 | 2.5          | Loricrin                                    |
| 17. | Os01g0747300      LOC_Os01g54340 | 2.2          | Unknown, DUF506                             |

The 158 genes identified in this study were compared with the genes reported by Chandran *et al.*<sup>25</sup> and Obertello *et al.*<sup>40</sup>. \*Fold change indicates the ratio of +NH<sub>4</sub>NO<sub>3</sub>/-N derived from this study.

**Table S9.** Sequences of primers used for quantitative RT-PCR analysis

| No. | Locus ID                      |                                   | Primer sequence 5'→3'                         |
|-----|-------------------------------|-----------------------------------|-----------------------------------------------|
| 1   | Os02g0770800                  | LOC_Os02g53130                    | CGGAGAAGCTCATTGGAATCT/CACCCTGAACCAGCAGTTGTT   |
| 2   | Os01g0860601                  | LOC_Os01g64120                    | CTCCTGTAGCGACATGCTTCGT/CCGTGCGCTATAATTGGTGATC |
| 3   | Os01g0631200                  | LOC_Os01g44050                    | TCCCAAGTTGATGAAGCATGG/CAACTGCAACAGCCGGTGTAT   |
| 4   | Os03g0609500                  | LOC_Os03g41330                    | TTTTTGGTCATGTGCAACTT/ATAGTCTGCAGCTAGCATTG     |
| 5   | Os03g0684700                  | LOC_Os03g48030                    | GCAGTCTGCGATGTGCTTTTC/TGTATTTCTTGGCAGCAGGTGA  |
| 6   | Os01g0606900                  | LOC_Os01g42190                    | GCGTACCAAGTGTGTCTGACG/TACATGCCTGAGTCGTAGAGCG  |
| 7   | Os02g0728001                  | LOC_Os02g49560                    | TGCCAGCTGAGAGATGAACAAG/GGTCTTCTCAAGCTGCTTCTGC |
| 8   | Os09g0484900                  | LOC_Os09g31130                    | GGAACGCCCTGAAAATTGT/TGGCAGTAGGATGGTGAGAGCT    |
| 9   | Os03g0445700                  | LOC_Os03g33090                    | GTTGTTCCAGTCGCTGCTGTAC/TGCACCGGATTGATGGTTC    |
| 10  | Os05g0525900                  | LOC_Os05g45020                    | CATCGATGAATGCGACGC/ATTGCGAACATCAACTCTTCCA     |
| 11  | Os09g0522200                  | LOC_Os09g35030                    | ACATGGGCTGGGACCTGTAC/TCCATGAGCATCCCCTGC       |
| 12  | Os01g0915000                  | LOC_Os01g68650                    | TCGGCGATGAAACATCATAA/GAAAGGAACTCTCGCTCTAA     |
| 13  | Os05g0114400                  | LOC_Os05g02390                    | AAGAGGTTTGCATTCGAGGACA/CATGAGCATCAGCACGCG     |
| 14  | Os04g0640900                  | LOC_Os04g54830                    | AGCCAACATTTTGCCATAGCC/CCTCTCGAAATGCCCAACATC   |
| 15  | Os11g0184900                  | LOC_Os11g08210                    | GATCAAGAAGGCGCTCGTCTT/CGTGCATGATCCAGTTGGTCT   |
| 16  | Os03g0233000                  | LOC_Os03g13050                    | ATGATAGCGAAAGCGATCGG/TCCCGTTTCTTCCGCACTT      |
| 17  | Os07g0119300                  | LOC_Os07g02800                    | CGAGAGTGCCAAGCTCAACAA/GGAATGTAACAGAGCCCTTGCA  |
| 18  | Os08g0452900                  | LOC_Os08g35160                    | CATGAACAAAACCGGCCCTAC/AACAGCTCCTCGAACTGCCTCT  |
| 19  | Os07g0589000                  | LOC_Os07g40000                    | TTTTTGGCCGTGTAAAAGTC/TGATGCTAACAAAGTAGGGG     |
| 20  | Os03g0784700                  | LOC_Os03g57120                    | AGCTACTGGCACTGGTGTGCT/TGAACATACGGCGTAGGTAGCC  |
| 21  | Os01g0699100                  | LOC_Os01g50370                    | GATATCCAAGCCGCTGATCGT/AGCGCAGACTTTATTCCGACG   |
| 22  | Os03g0764600                  | LOC_Os03g55590                    | CCCCCAAGTTGCTACTCCAAA/GGTGAGCCCATCAACCTTCAT   |
| 23  | Os01g0357100                  | LOC_Os01g25484                    | TCGACAAGAAATGGCAGAGGAG/ACGTAGGACATCCCTTCCTGCT |
| 24  | Os04g0480200                  | LOC_Os04g40410                    | TGTCAGTTCAAGATCGCCAG/TGCCACCGTGTACTCGAACTT    |
| 25  | Os03g0243100                  | LOC_Os03g13950                    | ATCTTCTTCATCGCCTGGTCAC/TCGCGTACAGAATCTTGGCTC  |
| 26  | Os09g0502500                  | LOC_Os09g32570                    | AGGCGAGGTGCTGATCAAGAT/TTCCAGTCGACCTGGTTGATG   |
| 27  | Os01g0130900                  | LOC_Os01g03980                    | ACGCCGAGATGGCCTTC/CGTAGATTTGGTGGATCCTCCA      |
| 28  | Os05g0360400                  | LOC_Os05g29710                    | GGTTTATGCACACCATTGGCA/CTGACAACACAAGCAGCAAACA  |
| 29  | Os03g0126700                  | LOC_Os03g03500                    | TCTTGCATTGCATCTGATCT/GAGAAAATGTACGTAGGGCT     |
| 30  | Os07g0530600                  | LOC_Os07g34640                    | TGACGCATCATCGACGGT/CGCTGTCTGACTGCTACTA        |
| 31  | Os11g0113700/<br>Os12g0113500 | LOC_Os11g02240/<br>LOC_Os12g02200 | TTTCGGAGCAGATCAGACGTG/TTATGAGCCACCAACCGCAT    |
| 32  | Os08g0492500                  | LOC_Os08g38460                    | ATCTCGAGCATGCCGGC/TGTTGTACAGCAGGTACGCCAC      |
| 33  | Os03g0148400                  | LOC_Os03g05460                    | TGGATTGCGAAATTCAGCCT/TTGCTCTGACTGAACCATGGC    |
| 34  | Os02g0595900                  | LOC_Os02g38230                    | AAGGCCTCCGACGACCTG/CGGTGACCTTGAACCTGGCA       |
| 35  | Os01g0646000                  | LOC_Os01g45840                    | TTTCAAGCCATGCCTGCAA/GCCATCGATCAACGTATTCCAT    |
| 36  | Os03g0114400                  | LOC_Os03g02330                    | ATCAAGATCAGGAGCCGAA/GTCAAGGGCATGAACCC         |
| 37  | Os07g0406300                  | LOC_Os07g22350                    | TGCCATTGAAGGAGAGCGAA/TGCGGCATCCAACATCA        |
| 38  | Os05g0455300                  | LOC_Os05g38130                    | TGACGCATCATCGACGGT/CGCTGTCTGACTGCTACTA        |

|    |              |                |                                               |
|----|--------------|----------------|-----------------------------------------------|
| 39 | Os02g0535901 | LOC_Os02g33240 | CCAAGAGGAGGTACGACGAGTT/ACTCCTTCCTGCCCTCTTC    |
| 40 | Os03g0823400 | LOC_Os03g60840 | CCACCCTCCCATCTCCATG/TGCTTCTCCTCTCTCTCGC       |
| 41 | Os01g0752500 | LOC_Os01g54890 | GTCGTTCGTACCTCCCGCTC/AAGAGGACCATGTCCAGCGA     |
| 42 | Os06g0633100 | LOC_Os06g42660 | GGACCAATTTTGTTCGTGAG/GATGATTACAGGGGTGAAA      |
| 43 | Os05g0443700 | LOC_Os05g37150 | AAGCCTCAATGTTTCATGCGG/CAAACCACGCATACTGCTACCA  |
| 44 | Os01g0733200 | LOC_Os01g53220 | TCCTACTTCAAGCACCGCAACT/GGAATCCGTAGGTGTTGAGCTG |
| 45 | Os06g0566300 | LOC_Os06g37010 | CTGCAACCCAAGGCTTCAAGT/TGGCCCCAAGAAACAGAGCTA   |
| 46 | Os11g0484500 | LOC_Os11g29400 | GCACACACCTATGAGCGCATT/CCACTCTGTGTGGAACGAACCT  |
| 47 | Os03g0759000 | LOC_Os03g55180 | CATTCAGGCACAGAAGGCAGA/GCCTCATGCAGCACAAGACAT   |
| 48 | Os03g0233900 | LOC_Os03g13140 | TCGAGAAGAACCCCAAGCTCA/TCATGACGAAGACGGACATGG   |
| 49 | Os11g0100300 | LOC_Os11g01030 | GCAGCAAGATCAAGGAGTAGCA/TCTCCCATGCAGAACCCAAT   |
| 50 | Os01g0780800 | LOC_Os01g57240 | TTCACTGTACGGAATGTGGCAA/ACTCTTCTTTAGACCGGAGCCG |
| 51 | Os01g0645900 | LOC_Os01g45830 | TCGTGCTGTACCTGTTGCTACG/CGAGCAGTCTCTGATATCCCA  |
| 52 | Os05g0497800 | None           | AGGGGAGGAAAAGGAGGAGGA/AAGTCCTCCACGCGCCACGGCCA |
| 53 | Os03g0807900 | LOC_Os03g59320 | AGTGTTCTTCGTGCTCTTGGA/TCATCACTCGCTCTGCAAGCT   |
| 54 | Os07g0583600 | LOC_Os07g39470 | AGAGGATCAACATGGAGCAGCA/ACGCGATGAGGTTGACGATCT  |
| 55 | Os02g0713700 | LOC_Os02g48320 | GTGGCATGTCGCTCTACAACCT/GCTCCAACCTCCGAAGTTGTCT |
| 56 | Os01g0948200 | LOC_Os01g71970 | CATGGCGCTCACGAAAGAA/TTGAACTGGAACGGCACGT       |
| 57 | Os01g0699600 | LOC_Os01g50420 | TGAAGTTTCGAAACACCGG/CACCAAAGACCGAAATCTGCA     |
| 58 | Os02g0623600 | LOC_Os02g41480 | TGACAAGA CGATAGGCAACGC/GGACTTGTATCCCCGCATGT   |
| 59 | Os02g0775600 | LOC_Os02g53530 | GGAGGTGGCATGCAAGGA/GACGAGGACAGCAAGCTCATC      |
| 60 | Os09g0418000 | LOC_Os09g25090 | TCGCTGGGTTACAGCGC/CTCCAACCTCAGCTTCCACC        |
| 61 | Os02g0693000 | LOC_Os02g46620 | AATTAAGTACGCGGGGAGA/ATCATAAGATTAGCACGCGA      |
| 62 | Os03g0776400 | LOC_Os03g56500 | ACGAGCACGGAATCTGGGA/TGAGATGGTTGCAGTAT         |
| 63 | Os05g0179100 | LOC_Os05g08620 | GAGTCGACTTTGATAAGGGG/TATCCTCAGCATCCTCACAT     |
| 64 | Os07g0509800 | LOC_Os07g32570 | ACGTACCAGCTGTTTCGACAAG/TCGTAGAAGGAGAAGAG      |
| 65 | Os01g0314800 | LOC_Os01g21250 | TTGCATCGAGCTGTCTCAGC/CCACCGAGTAACCCCTCCTT     |
| 66 | Os02g0205500 | LOC_Os02g11070 | GTTGGGTTTTGTGGTACTTG/TCCTGTTCTACCCTAACAA      |
| 67 | Os04g0475600 | LOC_Os04g39980 | TGGCCGTGCCAGTTCC/AGCCCACGGAGTCCTGC            |
| 68 | Os10g0203000 | LOC_Os10g13550 | CTTCTGCCAGGCACTTTGTCA/TTTAGGCGATCAGGATGGACC   |
| 69 | Os01g0525800 | None           | GCTTTTGTGCAACGTGAAA/CAATCCAAACGATCCCACTACA    |
| 70 | Os03g0196600 | LOC_Os03g10050 | GCCAAGATGGTCCACTGCTT/GGGCCTGCAGTGCCAG         |
| 71 | Os02g0158000 | LOC_Os02g06330 | GCGCAACGGCGGCAGCAA/GCAGAGCACGGAGGAAGA         |
| 72 | Os02g0533700 | LOC_Os02g33060 | TGATGGCGAGTATGACCCGT/GATCCTGAGCCACAGCGACT     |
| 73 | Os01g0705200 | LOC_Os01g50910 | GGCGATAACAAGAACAACGCC/AGTCACTCCCAGTTCAGGCTT   |
| 74 | Os01g0266400 | LOC_Os01g16140 | GAGAGCACCAAGCGTAATGGC/GAGGCTGTGTCCGCTCATGTA   |
| 75 | Os01g0823900 | LOC_Os01g60860 | CCGTCGTGGAGAAATTAGTG/GCCAATGCGTCCTTCTTTGT     |
| 76 | Os09g0246500 | LOC_Os09g07150 | GCCATGCGCGTCATTTTT/GGTAGTCGCCGTCGGAAA         |
| 77 | Os01g0699400 | LOC_Os01g50400 | TCGAAGCGTTGGAAACGATC/ATCAACACACTCTGCATCGCC    |
| 78 | Os07g0584100 | LOC_Os07g39520 | TGCAGCAACGTCTTCATCAAC/GTCCCCGATCTTGACCTGG     |
| 79 | Os05g0402900 | LOC_Os05g33400 | AATACTTCGTTCGGCTTGACGC/TTGTTGATGGCAAGCAGCG    |

|     |                  |                |                                                      |
|-----|------------------|----------------|------------------------------------------------------|
| 80  | Os05g0194900     | LOC_Os05g10650 | CAAGCAGTACTTCGTGAACGCC/TGTGCACCACGATCTTCTTCG         |
| 81  | Os01g0621900     | LOC_Os01g43370 | AGTCATGATGGTTGTTCCCGG/TGATGCACAAGCCAGATTTGC          |
| 82  | Os03g0838900     | LOC_Os03g62240 | GAGGACATTCTCCGCTGATCAA/TGTTGTCACCAGCATCGACAA         |
| 83  | Os03g0275900     | LOC_Os03g16824 | CCAAAAGTGGCACAGACAGAGG/CGCTCAAGAAGCTGGATTGCT         |
| 84  | Os05g0443500     | LOC_Os05g37140 | GCGGTGCACAAGGTAAAGCTT/GCTTCAAACCTCGTGCTCGACA         |
| 85  | Os01g0700100     | LOC_Os01g50460 | AGGCAACATCTTTGCGCTTG/TCTTAAACGTCGTCACTGGCG           |
| 86  | Os04g0523100     | LOC_Os04g44210 | CGCAATGAAGTGTGTCAGTGGCT/TTCCGCCGCCTTGAATTT           |
| 87  | Os03g0175200     | LOC_Os03g07890 | CATTTGGTTTCTCGATCTGC/TTGCATCTAAAACCCCTT              |
| 88  | Os04g0567800     | LOC_Os04g47990 | AGAAGGAGAAGGCGCTCAACTG/GCAGAACTTGGTGTTCGTCGA         |
| 89  | Os03g0292600     | None           | TAGGGCGAGCTGAGCCGCCTCAAGAT/ATGGCGTGCCTCGAGAGCGAGATAA |
| 90  | Os01g0212700     | LOC_Os01g11460 | TTCTCCATCGGCATCCTCTC/GGTGTACCAGATGGCGAGGT            |
| 91  | Os06g0166400     | LOC_Os06g07030 | GAGGAGCCCACAAGTATATC/TACTTGCTAACCACCACTTC            |
| 92  | Os05g0545400     | LOC_Os05g46760 | AGAATTTCGAGCTTCCCCACATT/TGTGCTGAGCATTGGCTTCTC        |
| 93  | Os07g0593000     | LOC_Os07g40300 | TCCATGGAGGCCAGATGAGTAG/CCATGTTCAACCGCAAAAGG          |
| 94  | Os04g0450900     | LOC_Os04g37790 | AGCCACTACGACAGCATGGATC/TTGCGAAGTATCGGCCTCTTC         |
| 95  | Os08g0473900     | LOC_Os08g36910 | CACCAGCAGCTTGTGTTTGTGCT/TGCTTGACCCGAGTTACAGGTC       |
| 96  | Os01g0292200     | LOC_Os01g18800 | CCTTCCCTTTGATGACCGAAA/GGATTTGAGTGTCCCCCTTGA          |
| 97  | Os07g0672600     | LOC_Os07g47540 | TGCAGCGACAATGTCTACCTCA/ATGTTTCAGGACGATCTTGCCG        |
| 98  | Os08g0207500     | LOC_Os08g10630 | TCATGGCGACTTTCTTCTCCC/AGCTGGATGAGATTGCGATCC          |
| 99  | Os09g0103400     | LOC_Os09g01610 | GCAATTCAAGGAGAAGATTGCG/GAAACCACCTTCCCAAGGAAAA        |
| 100 | Os02g0530300     | LOC_Os02g32840 | TTCCTCGCCATCCTCGTC/GCAGTGGAGGAAGGCAAGAAC             |
| 101 | Os05g0560200     | LOC_Os05g48650 | TGGAGATCGGCTTCCG/CTAGTCGCTGCGGGC                     |
| 102 | Os09g0400700     | LOC_Os09g23590 | TTCGAGGTCAGCTCCAATGGA/ACCGCTGATCTTCTTGCTCCCT         |
| 103 | Os03g0242300     | LOC_Os03g13870 | CAACGTTCTTCTGGATCGCC/CTCCTCGGGAACCTCGAAGC            |
| 104 | Os03g0297600     | LOC_Os03g18600 | GTTCGTCGACACCATCGTCA/GCGGTCTTGCGGAGAGACT             |
| 105 | Os06g0208700     | LOC_Os06g10650 | GGAACCATTTCGTC AACATCCC/ACTTTGAGCGCCTCTCGAATTT       |
| 106 | Os02g0575700     | LOC_Os02g36590 | CGACGATTTCAGCATCTGGAAGA/GCGAAGGAGATGATGTTCCCA        |
| 107 | Os07g0592600     | LOC_Os07g40290 | TCATGCCGGTCATGAACTTGT/CGAACAGGAAGTAGAGCCCCTT         |
| 108 | Os03g0230300     | LOC_Os03g12820 | ACCAGTTCATCCGGTTCTTGC/CCACGGTGGTCAACACATTGT          |
| 109 | Os02g0608600     | LOC_Os02g39570 | TGTCAATGATTGCCCTGGTGT/CGAGCAAAGACCCCTGTAACAA         |
| 110 | Os04g0583200     | LOC_Os04g49370 | ATTTGCTTAGGAGATTTGC/GCTTGACATGAGTGCGTACA             |
| 111 | Os01g0797600     | LOC_Os01g58420 | ACCGTATGATGAAGCTTGCA/TCGGAGTCACTTTGTGCAA             |
| 112 | Os01g0908200     | LOC_Os01g68020 | GCATGCAGTTCAGGAGAAAGGA/TTCACCAGAAGCCCCCACTTA         |
| 113 | Os02g0687200     | LOC_Os02g46210 | CCAGGAACTGCGACATCTTCAT/TAACCCTCACTGCTGCTTCGTC        |
| 114 | Os.22947.1.S1_at | LOC_Os04g06080 | TCCTGAGGAACAGGCAAGTC/TCGCTGGTTTCGAGGATACG            |
| 115 | Os04g0649500     | LOC_Os04g55600 | GCAGGCGTTCTTGCACTACTC/AGCACGAGGTTGAACGGC             |
| 116 | Os02g0771100     | LOC_Os02g53140 | AAATTGCGAAGACAGCATCACC/CCTGTTGCAAGTGCATATCGAAA       |
| 117 | Os01g0504100     | LOC_Os01g31940 | TCTGCCTCTGGGCCTTCTC/CCCCTTTCTTGACTCCCCATAG           |
| 118 | Os01g0787400     | LOC_Os01g57740 | GACGCCAATCCTTCTACCACAG/ACCACCTGCTTCTCATAACCGG        |
| 119 | Os05g0181800     | None           | CGGAGTAGGAGGAAATGGTCAC/GCCGGTTTCTACCTACTGTTCG        |
| 120 | Os07g0602900     | LOC_Os07g41160 | AGGAAGAGCATGATGGAGGACA/TTGTACAGGAACCCGTCGATCT        |

|     |              |                |                                               |
|-----|--------------|----------------|-----------------------------------------------|
| 121 | Os04g0649600 | LOC_Os04g55610 | GGGCTGGTTGTAAGTTGTAA/TGGCCGTATTTCACTTGTAT     |
| 122 | Os10g0546400 | LOC_Os10g39920 | AGCTAGAGTAGTTCGGAGTT/AGTGCAAGTACAGCAGTAAA     |
| 123 | Os02g0689200 | LOC_Os02g46380 | CCCCTCTGATTTTCAATTCCTG/CCAAGGAGTGAAGCAGAAAACG |
| 124 | Os01g0747300 | LOC_Os01g54340 | TGCATGAAGGAGAACAACATGC/GCATGTACTTGTGCTTCCTCCA |
| 125 | Os02g0160200 | LOC_Os02g06520 | GCACTGCCCCATTTTCTCAA/GCGATTGCTGAAGCTCTTTCA    |
| 126 | Os05g0454500 | LOC_Os05g38040 | ATCGGAGTCGCCATATTTTGG/AAACTCCCGAGCACCGTAATG   |
| 127 | Os02g0748300 | LOC_Os02g51350 | GGAACCATGAGTGTGAGCAGCT/CCGAAAAACCCTGATCATTGC  |
| 128 | Os01g0699500 | LOC_Os01g50410 | AGAAGCGATCGAATCCTCCATT/TGCCAAGATGTACGTGCAGGT  |
| 129 | Os07g0538400 | LOC_Os07g35390 | TTTTCGGTTCGAGATCAGACCC/TATGTGCCGATGACATTCTTGG |
| 130 | Os10g0541200 | LOC_Os10g39540 | CAATTGCGGATTCCTATTCTC/TGCTGTCAATGCTGTAGTCCCA  |
| 131 | Os03g0218400 | LOC_Os03g11900 | ACATCCCCATCGAGGAGATGA/AGAACCAGTGCTGCTTCCACAC  |
| 132 | Os04g0405300 | LOC_Os04g33240 | CGTTCATGAGTCTGCAAGAAAGTT/CCGGTGATCAGCGCCA     |
| 133 | Os04g0671200 | LOC_Os04g57550 | AAAATGCTACCTGACGCCACTG/ACCCAGCGTGAAACCAAAT    |
| 134 | Os02g0668500 | LOC_Os02g44820 | CGGGCTGTACGAGAAGCTG/TCCCACAGGTACTCGAGCCT      |
| 135 | Os01g0101700 | LOC_Os01g01160 | AGGAGGAGCATGACGAAGGA/CCGAGCTCCCCAGGAGAG       |
| 136 | Os07g0685700 | LOC_Os07g48630 | GCTCTGAGCAACAACAAGTTCC/GTCGATGGCCTCTTCCTTCAT  |
| 137 | Os07g0225300 | LOC_Os07g12340 | TGTGCCGGCTGTACAACAA/TTCCTGCTCTGCATCTTCTCC     |
| 138 | Os01g0812200 | LOC_Os01g59690 | GCCTGCAACATGAAGCTGAAAT/TCATGCCACCAGGTAGCTCAA  |
| 139 | Os04g0528800 | LOC_Os04g44650 | CAATCTCCCCTTCAAGGTGGA/AAGAACCGGACCGGTTTGT     |
| 140 | Os04g0460600 | LOC_Os04g38720 | GGACAAGGACATCTTCAGACGG/AACGAGCGTCTTCTTCATGCC  |
| 141 | Os05g0429000 | LOC_Os05g35440 | AAAAATGCCCAAGCTTTGGC/CCAGTCTGCATTTCTCCTGAG    |
| 142 | Os06g0202700 | LOC_Os06g10130 | CGCAGGTCGTTTACCTCATCCT/AGGAGCCAAGAAGACGTGAAGC |
| 143 | Os08g0446800 | LOC_Os08g34700 | CGACGAGAAGAAGAAGGTGCAG/TGCTCACCATTCTCACCATCCT |
| 144 | Os10g0576600 | LOC_Os10g42610 | ACTGCTACGTGCTTGGATCGT/CCTCTTCCGCGTCCCAC       |
| 145 | Os01g0733001 | LOC_Os01g53210 | GAAGGATGGGGCTAAGAGT/AATGTAGCCAGTCTCTCCAC      |
| 146 | Os09g0522000 | LOC_Os09g35010 | GTCTCCGGCGGAGACCTT/TTGTTGTCTTCTTCTTCGTCGC     |
| 147 | Os02g0767400 | LOC_Os02g52850 | GCAACGACATTGTGATCCCTG/TGGTCATGTCCTCGATCTCCTC  |
| 148 | Os04g0648900 | LOC_Os04g55520 | CAAGAACCCGGATCTCAAC/CGGCGTCGGAGTTCT           |
| 149 | Os02g0324700 | LOC_Os02g21920 | TTCCTGCTTTACACCGCCAA/AGTAGATCTTCTCGTCGGCGCT   |
| 150 | Os06g0107800 | LOC_Os06g01860 | GGCGCTTCCGCTACTCCTA/TGGTGATGACGTAGCTCTGGC     |
| 151 | Os02g0768300 | LOC_Os02g52930 | TTCAACCCGCTCTGCATGA/TCCTTGAGAATGATGGAGCCC     |
| 152 | Os03g0710000 | LOC_Os03g50210 | AAATCTGGCAGGATCAGACGTG/CGGACCACTTCATCATCCTCAG |
| 153 | Os02g0605900 | LOC_Os02g39330 | ACGCCAACACGAGACCATAA/GTCCGTCGATCTCCTCGATGTA   |
| 154 | Os05g0450600 | LOC_Os05g37800 | TGGAAACGGAAGCCAATGGT/ATGTGGTCCTTCATGGCCTTG    |
| 155 | Os10g0560000 | LOC_Os10g41060 | TTCCAGCCATCTGCAACAT/GGTGGCTGCTGATTGAATTCC     |
| 156 | Os01g0667900 | LOC_Os01g47760 | GCGTACGTGATGATGAGTAT/AAATGTCACTGTCCCTCTTC     |
| 157 | Os01g0612900 | LOC_Os01g42730 | CTTACGGAGGCAACCTACAAG/GCATATGACCTAGCACCCCTT   |
| 158 | Os03g0247900 | LOC_Os03g14370 | ACGGACTTGGATTACGTGGTGT/ACGCCGTATGTAGAACTCCTGC |
| 159 | Os05g0192100 | LOC_Os05g10370 | CAAGGAGATCTGGGTGTTT/GTAGTAGGGGAGGTTGGAG       |
| 160 | Os10g0572300 | LOC_Os10g42190 | GGCAAATTGCAAGATGTTACCG/TGCCATGATCCTATTCTCGGAA |
| 161 | Os01g0196300 | LOC_Os01g09990 | GCGATGAGACGAAGCGAAAG/CGCTCGTCGTCACCTCG        |



|     |              |                |                                                 |
|-----|--------------|----------------|-------------------------------------------------|
| 162 | Os07g0154100 | LOC_Os07g05940 | ACTTCGCCGTCACCGAGAACTA/GCACCATCTCCTGGAGCTTGAA   |
|     | UBC3         |                |                                                 |
| 163 | Os02g0634800 | LOC_Os02g42314 | AAGGCATGGCTGATTCATGT/CAGATGTTACATGGTGACAGTA     |
|     | UBQ10        |                |                                                 |
| 164 | Os02g0161900 | LOC_Os02g06640 | TGGTCAGTAATCAGCCAGTTTGG/GCACCAAAATACTTGACGAACAG |

---
